# Supplementary material for: Discovery of Inhibitors of Trypanosoma brucei by Phenotypic Screening of a Focused Protein Kinase Library
Source: PubMed Central journal article supplement (PMC4648050; doi:10.1002/cmdc.201500300), 2015-09-18

## Supporting Information

### **Discovery of Inhibitors of *Trypanosoma brucei* by Phenotypic Screening of a Focused Protein Kinase Library**

Andrew Woodland,<sup>[a]</sup> Stephen Thompson,<sup>[a]</sup> Laura A. T. Cleghorn,<sup>[a]</sup> Neil Norcross,<sup>[a]</sup> Manu De Rycker,<sup>[a]</sup> Raffaella Grimaldi,<sup>[a]</sup> Irene Hallyburton,<sup>[a]</sup> Bhavya Rao,<sup>[a]</sup> Suzanne Norval,<sup>[a]</sup> Laste Stojanovski,<sup>[a]</sup> Reto Brun,<sup>[b]</sup> Marcel Kaiser,<sup>[b]</sup> Julie A. Frearson,<sup>[a]</sup> David W. Gray,<sup>[a]</sup> Paul G. Wyatt,<sup>[a]</sup> Kevin D. Read,<sup>[a]</sup> and Ian H. Gilbert<sup>†\*<sup>[a]</sup></sup>

cmdc\_201500300\_sm\_miscellaneous\_information.pdf

## SUPPORTING INFORMATION

Table of contents:

1. Synthetic procedures for compounds **5-60**
2. Kinase Profiling
3. SOP for the initial screen of the DDU kinase set
4. Static/Cidal dose reponse and kill curves.

## S1. Synthetic procedures for compounds 5-60

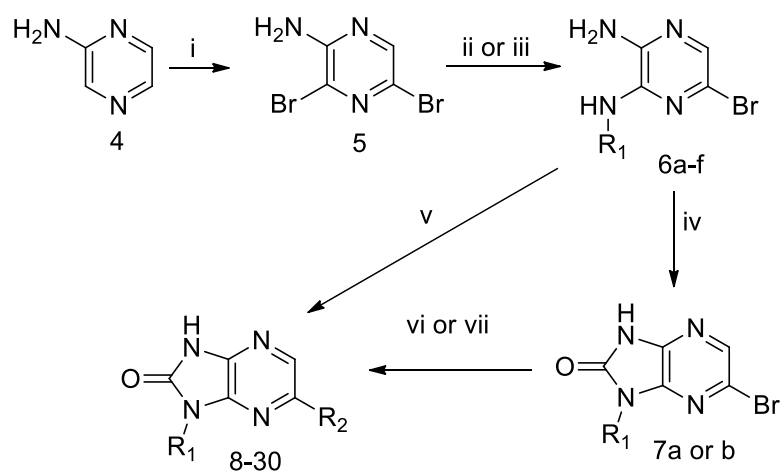

### Scheme 1:

i. NBS, MeCN, 18h, rt., 12%; ii. Amine, DIPEA, EtOH, 180 °C,  $\mu$ W, 30 min, 27-64%; iii. cyclohexylamine, DIPEA, n-BuOH, 220 °C,  $\mu$ W, 30 min, 95%; iv. CDI, 1,4-dioxane, 80 °C, 16 h, 31%; v. For compounds 8-11, 13-15 and 17-18; a) Pd(PPh<sub>3</sub>)<sub>4</sub> (3 mol%), K<sub>2</sub>CO<sub>3</sub> (1.5 M aqueous solution), Boronic acid, DMF, 140 °C, 5 mins; b) CDI, 1,4-dioxane, 140 °C, 20min, 3-34%; vi) For compounds 12 and 19-29; Pd(PPh<sub>3</sub>)<sub>4</sub> (3 mol%), K<sub>2</sub>CO<sub>3</sub> (1.5 M aqueous solution), Boronic acid, DMF, 140 °C, 5 mins, 7-67% vii) For compound 16; 7, H<sub>2</sub>, 5% Pd/C, MeOH, 15%

### 3,5-dibromopyrazin-2-amine (5)

Pyrazin-2-amine (49.9 g, 52.5 mmol) was dissolved in MeCN (1 L), cooled to 5 °C then NBS (203 g, 1.1 mol) was added portion-wise over 2 hours. The temperature was allowed to increase to room temperature and the mixture stirred for 16 hours. The reaction mixture was concentrated then partitioned between EtOAc (500 mL) and water (500 mL), the mixture filtered through celite to remove the insoluble fraction. The organic fraction was retained and the aqueous layer was extracted with EtOAc (3 x 200 mL). The combined organics were washed with sodium hydroxide (1 M solution in water, 200 mL), water (200 mL) and brine (200 mL) then dried over MgSO<sub>4</sub> and concentrated *in vacuo*. The resultant crude residue was purified by column chromatography, eluting with 0-50% EtOAc/Pet. Ether 40-60 °C,

followed by re-crystallisation from EtOAc to give the title compound **5** (15.9 g, 12%) as yellow needles.

$^1\text{H}$  NMR (500 MHz, DMSO- $d_6$ ):  $\delta$  8.15 (s, 1H), 7.00 (s, 2H).

LRMS (ES+):  $m/z$  (%) 251.9 [ $^{79}\text{Br}/^{79}\text{Br}$  M+H] $^+$ , (60), 253.9 [ $^{79}\text{Br}/^{81}\text{Br}$  M+H] $^+$  (100), 255.9 [ $^{81}\text{Br}/^{81}\text{Br}$  M+H] $^+$  (50)

### **(R)-6-bromo-N2-(1-phenylethyl)pyrazine-2,3-diamine (6a)**

3,5-dibromopyrazin-2-amine (4.0g, 15.8 mmol), (R)-1-phenylethanamine (2.24 mL, 17.4 mmol) and DIPEA (3.02 mL, 17.4 mmol) in ethanol (20 mL) was split into 2 batches, each of which were heated under microwave irradiation at 180 °C for 90 minutes. The reactions were cooled and combined then concentrated. The resulting slurry was partitioned between EtOAc (20 mL) and water (10 mL), the organic layer was washed with brine (200 mL) and concentrated *in vacuo*. The resultant crude residue was purified by column chromatography, eluting with 30-50% EtOAc/Pet. Ether 40-60 °C, to give the title compound **6a** (2.35g, 51%) as a clear oil.

$^1\text{H}$  NMR (500 MHz, DMSO- $d_6$ ):  $\delta$  7.38-7.28 (m, 4H), 7.24 (m, 1H), 7.16 (s, 1H), 6.86 (d,  $J$  = 7.2 Hz, 1H), 6.30 (s, 2H), 5.08 (m, 1H), 1.47 (d,  $J$  = 7.0 Hz, 3H)

LRMS (ES+):  $m/z$  (%) 293.0 [ $^{79}\text{Br}$  M+H] $^+$ , (100), 295.0 [ $^{81}\text{Br}$  M+H] $^+$  (98)

### **6-bromo-N2-cyclohexylpyrazine-2,3-diamine (6b)**

3,5-dibromopyrazin-2-amine (16.0 g, 63.2 mmol), DIPEA (19.2 mL, 110 mmol), cyclohexylamine (12.8 mL, 112 mmol) and *n*-butanol (120 mL) was split into 8 batches each of which were heated under microwave irradiation at 220 °C for 30 minutes. The reactions were cooled, combined and concentrated *in vacuo*. The resulting slurry was partitioned between EtOAc (200 mL) and water (200 mL), the organic layer was washed with water (200 mL) and brine (200 mL) and concentrated *in vacuo*. The resultant crude residue was purified by column chromatography, eluting with 0-50% EtOAc/Pet. Ether 40-60 °C to give the title compound **6b** (16.2 g, 95%) as a brown oil.

$^1\text{H}$  NMR (500 MHz, DMSO- $d_6$ ):  $\delta$  7.13 (s, 1H), 6.25 (d,  $J$  = 7.15 Hz, 1H), 6.20 (s, 2H), 3.74-3.68 (m, 1H), 1.94-1.87 (m, 2H), 1.75-1.72 (m, 2H), 1.63-1.60 (m, 1H), 1.37-1.13 (m, 5H).

LRMS (ES+):  $m/z$  (%) 271.1 [ $^{79}\text{Br M+H}$ ] $^+$ , (100), 273.1 [ $^{81}\text{Br M+H}$ ] $^+$  (98)

**1-benzyl-6-(4-fluorophenyl)-1H-imidazo[4,5-b]pyrazin-2(3H)-one (9) (General method 1)**

3,5-dibromopyrazin-2-amine (400mg, 1.58 mmol), benzylamine (189 $\mu\text{L}$ , 1.74 mmol) and DIPEA (302  $\mu\text{L}$ , 1.74 mmol) in ethanol (2 mL) was heated under microwave irradiation at 180 °C for 90 minutes. The reaction was cooled to room temperature and concentrated *in vacuo*. The resulting slurry was partitioned between DCM (20 mL) and water (10 mL), the organic layer was washed with brine (10 mL) and concentrated *in vacuo*. The resultant crude residue was purified by column chromatography, eluting with 20% EtOAc/hexane to give **N2-benzyl-6-bromopyrazine-2,3-diamine (6f)** (281 mg, 64%) as a brown oil.

**N2-benzyl-6-bromopyrazine-2,3-diamine (6f)** (281 mg, 1.10 mmol), 4-fluorophenylboronic acid (154 mg, 1.10 mmol), tetrakis(triphenylphosphine)palladium (0) (58 mg, 0.05 mmol), potassium carbonate (414 mg, 3.0 mmol) in water (5 mL), and DMF (5 mL) were combined and heated under microwave irradiation at 160 °C for 5 minutes. The reaction was then cooled to room temperature and the mixture diluted with a 10 : 1 mixture of DCM : MeOH (10 mL). The mixture was poured onto an SCX-2 column and allowed to drip through then washed with 10 : 1 mixture of DCM : MeOH (10 mL). The SCX-2 column was then eluted with ammonia in MeOH (7 N, 20 mL) and the elutes concentrated *in vacuo*. The resultant brown solid was dissolved in 1,4-dioxane (2 mL) and CDI (140 mg, 0.86 mmol) added. The mixture was heated under microwave irradiation at 140 °C for 20 minutes, cooled to room temperature and concentrated *in vacuo*. The resultant crude residue was purified by column chromatography, eluting with 0-100% EtOAc /Pet. Ether 40-60 °C to give the title compound **(9)** (47 mg, 15%) was obtained as an off-white solid.

$^1\text{H}$  NMR (500 MHz,  $\text{DMSO-}d_6$ ):  $\delta$  12.19 (s, 1H), 8.53 (s, 1H), 8.09-8.06 (brs, 2H), 7.43-7.27 (m, 7H), 5.08 (s, 2H).

LRMS (ES+):  $m/z$  (%) 321.0 [ $\text{M+H}$ ] $^+$  (100)

HRMS ( $m/z$ ): [ $\text{M+H}$ ] $^+$  calcd. for  $\text{C}_{18}\text{H}_{14}\text{FN}_4\text{O}$ , 321.1146; found 321.1131.

**(S)-6-(4-fluorophenyl)-1-(1-phenylethyl)-1H-imidazo[4,5-b]pyrazin-2(3H)-one (8)**

Following the method outlined in General method 1, but using (S)-1-phenylethanamine (224  $\mu\text{L}$ , 1.74 mmol) the title compound **(8)** (23 mg, 15%) was obtained as a yellow solid.

<sup>1</sup>H NMR (500 MHz, DMSO-*d*<sub>6</sub>): δ 12.16 (s, 1H), 8.51 (s, 1H), 8.06-8.03 (m, 2H), 7.50 (m, 2H), 7.37-7.26 (m, 5H), 5.74 (q, *J* = 7.3 Hz, 1H), 2.02 (d, *J* = 7.3 Hz, 3H).

**1-(cyclopropylmethyl)-6-(4-fluorophenyl)-1H-imidazo[4,5-b]pyrazin-2(3H)-one (10)**

Following the method outlined in General method 1, but using cyclopropylmethanamine (200μL, 1.74 mmol), the title compound (**10**) (6 mg, 3%) was obtained as a yellow solid.

<sup>1</sup>H NMR (500 MHz, DMSO-*d*<sub>6</sub>): δ 12.09 (s, 1H), 8.51 (s, 1H), 8.09 (m, 2H), 7.33 (m, 2H), 3.76 (d, *J* = 7.1 Hz, 2H), 1.28 (m, 1H), 0.53 (m, 2H), 0.45 (m, 2H).

LRMS (ES<sup>+</sup>): *m/z* (%) 285.1 [M+H]<sup>+</sup> (100)

HRMS (*m/z*): [M+H]<sup>+</sup> calcd. for C<sub>15</sub>H<sub>14</sub>FN<sub>4</sub>O, 285.1146; found 285.1149

**6-(4-fluorophenyl)-1-methyl-1H-imidazo[4,5-b]pyrazin-2(3H)-one (11)**

Following the method outlined in General method 1, but using methylamine (870μL, 2M solution in MeOH, 1.74 mmol), the title compound (**11**) (6 mg, 3%) as an off-white solid.

<sup>1</sup>H NMR (500 MHz, DMSO-*d*<sub>6</sub>): δ 12.05 (s, 1H), 8.50 (s, 1H), 8.10 (dd, 2H, *J* = 5.5 and 9.0 Hz), 7.33 (t, 2H, *J* = 8.9 Hz), 5.08 (s, 2H).

HRMS (*m/z*): [M+H]<sup>+</sup> calcd. for C<sub>12</sub>H<sub>10</sub>FN<sub>4</sub>O, 245.0833; found 245.0826

**(R)-6-phenyl-1-(1-phenylethyl)-1H-imidazo[4,5-b]pyrazin-2(3H)-one (14) (General method 2)**

(R)-6-bromo-N<sub>2</sub>-(1-phenylethyl)pyrazine-2,3-diamine (**6a**) (100 mg, 0.35 mmol), phenyl boronic acid (44 mg, 0.35 mmol), tetrakis(triphenylphosphine)palladium (0) (20 mg, 0.018 mmol), potassium carbonate (700μL of a 1.5M solution in water, 1.05 mmol) and DMF (2 mL) were combined and heated under microwave irradiation at 160 °C for 5 minutes. The reaction was then cooled to room temperature and the mixture diluted with a 10 : 1 mixture of DCM : MeOH (10 mL). The mixture was poured onto an SCX-2 column and allowed to drip through then washed with 10 : 1 mixture of DCM : MeOH (10 mL). The SCX-2 column was then eluted with ammonia in MeOH (7 N, 20 mL) and the elutes concentrated *in vacuo*. The resultant brown solid was dissolved in 1,4-dioxane (2 mL) and CDI (140 mg, 0.86 mmol)

added. The mixture was heated under microwave irradiation at 140 °C for 20 minutes, cooled to room temperature and concentrated *in vacuo*. The resultant crude residue was purified by column chromatography, eluting with 0-100% EtOAc /Pet. Ether 40-60 °C to give the title compound (**14**) (21 mg, 18%) was obtained as a pale yellow solid.

<sup>1</sup>H NMR (500 MHz, DMSO-*d*<sub>6</sub>): δ 12.12 (s, 1H), 8.51 (s, 1H), 8.00 (d, *J* = 7.3 Hz, 2H), 7.55-7.47 (m, 4H), 7.42-7.34 (m, 3H), 7.27 (t, *J* = 7.3 Hz, 1H), 5.74 (q, *J* = 7.2 Hz, 1H), 2.03 (d, *J* = 7.3 Hz, 3H).

LRMS (ES+): *m/z* (%) 317.1 [M+H]<sup>+</sup> (97)

HRMS (*m/z*): [M+H]<sup>+</sup> calcd. for C<sub>19</sub>H<sub>17</sub>N<sub>4</sub>O, 317.1397; found 317.1394

### **(R)-1-(1-phenylethyl)-6-(4-(trifluoromethoxy)phenyl)-1H-imidazo[4,5-b]pyrazin-2(3H)-one (15)**

Following the method outlined in General method 2, but using 4-(trifluoromethoxy)phenylboronic acid (82 mg, 0.4 mmol), the title compound (**15**) (57 mg, 34%) was obtained as a yellow solid.

<sup>1</sup>H NMR (500 MHz, DMSO-*d*<sub>6</sub>): δ 12.18 (s, 1H), 8.55 (s, 1H), 8.14-8.12 (m, 2H), 7.51-7.47 (m, 4H), 7.37-7.34 (m, 2H), 7.29-7.26 (m, 1H), 5.74 (q, *J* = 7.2 Hz, 1H), 2.02 (d, *J* = 7.3 Hz, 3H).

LRMS (ES+): *m/z* (%) 401.2 [M+H]<sup>+</sup> (100)

HRMS (*m/z*): [M+H]<sup>+</sup> calcd. for C<sub>20</sub>H<sub>16</sub>F<sub>3</sub>N<sub>4</sub>O<sub>2</sub>, 401.1220; found 401.1224

### **(R)-6-(3-fluorophenyl)-1-(1-phenylethyl)-1H-imidazo[4,5-b]pyrazin-2(3H)-one (17)**

Following the method outlined in General method 2, but using 3-fluorophenylboronic acid (56 mg, 0.4 mmol), the title compound (**17**) (40 mg, 34%) was obtained as a yellow solid.

<sup>1</sup>H NMR (500 MHz, DMSO-*d*<sub>6</sub>): δ 12.18 (s, 1H), 8.58 (s, 1H), 7.87 (d, *J* = 7.8 Hz, 1H), 7.80 (d, *J* = 10.7 Hz, 1H), 7.55-7.49 (m, 3H), 7.37-7.34 (m, 2H), 7.29-7.21 (m, 2H), 5.75 (q, *J* = 7.2 Hz, 1H), 2.02 (d, *J* = 7.3 Hz, 3H).

LRMS (ES+): *m/z* (%) 335.1 [M+H]<sup>+</sup> (90)

HRMS (m/z): [M+H]<sup>+</sup> calcd. for C<sub>19</sub>H<sub>16</sub>FN<sub>4</sub>O, 335.1303; found 335.1299

**(R)-N-(4-(2-oxo-3-(1-phenylethyl)-2,3-dihydro-1H-imidazo[4,5-b]pyrazin-5-yl)phenyl)methanesulfonamide (18)**

Following the method outlined in General method 2, but using (R)-6-bromo-N<sup>2</sup>-(1-phenylethyl)pyrazine-2,3-diamine (100 mg, 0.35 mmol) and N-(3-(4,4,5,5-tetramethyl-1,3,2-dioxaborolan-2-yl)-phenyl)methanesulfonamide (81 mg, 0.27 mmol), the title compound (**18**) (7 mg, 3%) was obtained as a yellow solid.

<sup>1</sup>H NMR (500 MHz, DMSO-*d*<sub>6</sub>): δ 12.14 (s, 1H), 9.92 (s, 1H), 8.47 (s, 1H), 7.97 (s, 1H), 7.73 (d, *J* = 7.9 Hz, 1H), 7.56 (d, *J* = 7.7 Hz, 1H), 7.44 (t, *J* = 7.9 Hz, 1H), 7.37-7.34 (m, 2H), 7.29-7.24 (m, 2H), 5.74-5.70 (m, 1H), 3.05 (s, 3H), 2.05 (d, *J* = 7.3 Hz, 3H).

LRMS (ES<sup>+</sup>): *m/z* (%) 410.0 [M+H]<sup>+</sup> (100)

HRMS (m/z): [M+H]<sup>+</sup> calcd. for C<sub>20</sub>H<sub>20</sub>N<sub>5</sub>O<sub>3</sub>S, 410.1281; found 410.1272

**(R)-6-bromo-1-(1-phenylethyl)-1H-imidazo[4,5-b]pyrazin-2(3H)-one 7a**

(R)-6-bromo-N<sup>2</sup>-(1-phenylethyl)pyrazine-2,3-diamine (1g, 3.4 mmol), CDI (1.66 g, 10.2 mmol) and 1,4-dioxane (15 mL) were heated under microwave irradiation at 140 °C for 20 minutes and concentrated *in vacuo*. The resultant crude residue was purified by column chromatography, eluting with 1-5% MeOH/DCM, followed by trituration with EtOAc/hexane to give the title compound **7a** (947 mg, 87%) as a brown solid.

<sup>1</sup>H NMR (500 MHz, DMSO-*d*<sub>6</sub>): δ 12.31 (s, 1H), 8.05 (s, 1H), 7.38 (m, 2H), 7.35 (m, 2H), 7.28 (m, 1H), 5.62 (q, *J* = 7.3 Hz, 1H), 1.90 (d, *J* = 7.3 Hz, 3H)

LRMS (ES<sup>+</sup>): *m/z* (%) 319.0 [<sup>79</sup>Br M+H]<sup>+</sup>, (98), 321.0 [<sup>81</sup>Br M+H]<sup>+</sup> (100)

HRMS (m/z): [M+H]<sup>+</sup> calcd. for C<sub>13</sub>H<sub>12</sub><sup>79</sup>BrN<sub>4</sub>O, 319.0189; found 319.0197

**6-bromo-1-cyclohexyl-1H-imidazo[4,5-b]pyrazin-2(3H)-one, 7b**

6-bromo-N<sup>2</sup>-cyclohexylpyrazine-2,3-diamine (16.25g, 63.2 mmol), CDI (12.3g, 75.9 mmol) and 1,4-dioxane (200 mL) were combined then heated to 80 °C under nitrogen atmosphere



for 16 h then cooled and concentrated *in vacuo*. The resultant crude residue was purified by column chromatography, eluting with 50% EtOAc/petrol ether 40-60 °C to give the title compound **7b** (5.8 g, 31%) as a white solid.

<sup>1</sup>H NMR (500 MHz, DMSO-*d*<sub>6</sub>): δ 12.2 (s, 1H), 8.02 (s, 1H), 4.17-4.11 (s, 1H), 2.18-2.11 (m, 2H), 1.85-1.76 (m, 4H), 1.68-1.66 (m, 1H), 1.41-1.33 (m, 2H) and 1.23-1.16 (m, 1H).

LRMS (ES+): *m/z* (%) 297.0 [<sup>79</sup>Br M+H]<sup>+</sup> (98), 299.0 [<sup>81</sup>Br M+H]<sup>+</sup> (100)

HRMS (*m/z*): [M+H]<sup>+</sup> calcd. for C<sub>11</sub>H<sub>14</sub><sup>79</sup>BrN<sub>4</sub>O, 297.0346; found 297.0360

### **1-cyclohexyl-6-(4-fluorophenyl)-1H-imidazo[4,5-b]pyrazin-2(3H)-one (12) (General method 3)**

6-bromo-1-cyclohexyl-1H-imidazo[4,5-b]pyrazin-2(3H)-one **7b** (100 mg, 0.33 mmol), tetrakis(triphenylphosphine)palladium (0) (12 mg, 0.01 mmol), potassium carbonate (0.65 mL of a 1.5 M solution in water, 1.0 mmol), 4-fluorophenyl boronic acid (46 mg, 0.33 mmol), in DMF (2.0 mL) were combined and the mixture heated under microwave irradiation at 180 °C for 5 minutes. The reaction mixture was absorbed onto silica and purified by chromatography eluting with 50% EtOAc/Pet. Ether 40-60 °C to give the title compound (**12**) (17 mg, 16%) as a yellow solid.

<sup>1</sup>H NMR (500 MHz, DMSO-*d*<sub>6</sub>): δ 12.04 (s, 1H), 8.49 (s, 1H), 8.10-8.07 (m, 2H), 7.34 (t, *J* = 8.8 Hz, 2H), 4.28-4.22 (m, 1H), 2.37-2.29 (m, 2H), 1.88-1.80 (m, 4H), 1.71 (d, *J* = 12.8 Hz, 1H), 1.44-1.36 (m, 2H), 1.29-1.22 (m, 1H).

LRMS (ES+): *m/z* (%) 313.2 [M+H]<sup>+</sup> (100)

HRMS (*m/z*): [M+H]<sup>+</sup> calcd. for C<sub>17</sub>H<sub>18</sub>FN<sub>4</sub>O, 313.1459; found 313.1458

### **1-cyclohexyl-6-phenyl-1H-imidazo[4,5-b]pyrazin-2(3H)-one (19)**

Following the method outlined in General method 3, but using phenyl boronic acid (46 mg, 0.33 mmol), the title compound (**19**) (65 mg, 67%) was obtained as a pale yellow solid.

<sup>1</sup>H NMR (500 MHz, DMSO-*d*<sub>6</sub>): δ 12.04 (s, 1H), 8.50 (s, 1H), 8.03 (m, 2H), 7.50 (m, 2H), 7.40 (m, 1H), 4.25 (m, 1H), 2.33 (m, 2H), 1.86-1.80 (m, 4H), 1.72 (m, 1H), 1.42-1.36 (m, 2H), 1.26 (m, 1H).

LRMS (ES<sup>+</sup>): *m/z* (%) 295.1 [M+H]<sup>+</sup> (100)

HRMS (*m/z*): [M+H]<sup>+</sup> calcd. for C<sub>17</sub>H<sub>19</sub>N<sub>4</sub>O, 295.1553; found 295.1548

**1-cyclohexyl-6-(4-methoxyphenyl)-1H-imidazo[4,5-b]pyrazin-2(3H)-one (20)** Following the method outlined in General method 3, but using 4-methoxyphenyl boronic acid (36 mg, 0.33 mmol), the title compound **(20)** (36 mg, 34%) was obtained as a pale yellow solid.

<sup>1</sup>H NMR (500 MHz, DMSO-*d*<sub>6</sub>): δ 11.96 (s, 1H), 8.42 (s, 1H), 7.98 (d, *J* = 8.9 Hz, 2H), 7.06 (d, *J* = 8.9 Hz, 2H), 4.25 (m, 1H), 3.81 (s, 3H), 2.33 (m, 2H), 1.86-1.80 (m, 4H), 1.72 (m, 1H), 1.42-1.36 (m, 2H), 1.26 (m, 1H).

LRMS (ES<sup>+</sup>): *m/z* (%) 325.2 (100)

HRMS (*m/z*): [M+H]<sup>+</sup> calcd. for C<sub>18</sub>H<sub>21</sub>N<sub>4</sub>O<sub>2</sub>, 325.1659; found 325.1643

**1-cyclohexyl-6-(4-(hydroxymethyl)phenyl)-1H-imidazo[4,5-b]pyrazin-2(3H)-one (21)**

Following the method outlined in General method 3, but using 4-hydroxymethylphenyl boronic acid (50 mg, 0.33 mmol), the title compound **(21)** (43 mg, 39%) was obtained as a yellow solid.

<sup>1</sup>H NMR (500 MHz, DMSO-*d*<sub>6</sub>): δ 12.01 (s, 1H), 8.47 (s, 1H), 7.98 (d, *J* = 8.2 Hz, 2H), 7.44 (d, *J* = 8.2 Hz, 2H), 5.27 (t, *J* = 5.7 Hz, 1H), 4.56 (d, *J* = 5.7 Hz, 2H), 4.28-4.23 (m, 1H), 2.37-2.30 (m, 2H), 1.88-1.80 (m, 4H), 1.71 (d, *J* = 12.1 Hz, 1H), 1.44-1.37 (m, 2H), 1.29-1.24 (m, 1H).

LRMS (ES<sup>+</sup>): *m/z* (%) 325.2 [M+H]<sup>+</sup> (99)

HRMS (*m/z*): [M+H]<sup>+</sup> calcd. for C<sub>18</sub>H<sub>21</sub>N<sub>4</sub>O<sub>2</sub>, 325.1659; found 325.1653

**4-(3-cyclohexyl-2-oxo-2,3-dihydro-1H-imidazo[4,5-b]pyrazin-5-yl)-N-methylbenzamide (22)**

Following the method outlined in General method 3, but using, 4-(N-methylbenzamide)boronic acid (59 mg, 0.33 mmol), the title compound (**22**) (21 mg, 18%) was obtained as a yellow solid.

$^1\text{H}$  NMR (500 MHz, DMSO- $d_6$ ):  $\delta$  12.10 (s, 1H), 8.69 (s, 1H), 8.58 (s, 1H), 8.53-8.51 (m, 1H), 8.12 (d,  $J = 8.4$  Hz, 2H), 7.95 (d,  $J = 8.4$  Hz, 2H), 2.82 (d,  $J = 4.5$  Hz, 3H), 2.37-2.24 (m, 1H), 1.89-1.81 (m, 4H), 1.72 (d,  $J = 12.3$  Hz, 1H), 1.45-1.37 (m, 2H), 1.30-1.25 (m, 1H).

LRMS (ES<sup>+</sup>):  $m/z$  (%) 352.2 [M+H]<sup>+</sup> (99)

HRMS ( $m/z$ ): [M+H]<sup>+</sup> calcd. for C<sub>19</sub>H<sub>22</sub>N<sub>5</sub>O<sub>2</sub>, 352.1768; found 352.1781

**1-cyclohexyl-6-(4-((dimethylamino)methyl)phenyl)-1H-imidazo[4,5-b]pyrazin-2(3H)-one (23)**

Following the method outlined in General method 3, but using 4-[(dimethylamino),methyl]boronic acid hydrochloride (67 mg, 0.33 mmol), the title compound (**23**) (13 mg, 11%) was obtained as a pale yellow solid.

$^1\text{H}$  NMR (500 MHz, DMSO- $d_6$ ):  $\delta$  12.02 (s, 1H), 8.47 (s, 1H), 7.97 (d,  $J = 8.2$  Hz, 2H), 7.41 (d,  $J = 8.2$  Hz, 2H), 4.26-4.25 (m, 1H), 2.37-2.30 (m, 2H), 2.17 (s, 6H), 1.88-1.80 (m, 4H), 1.71 (d,  $J = 12.9$  Hz, 1H), 1.42-1.36 (m, 2H), 1.27-1.24 (m, 1H).

LRMS (ES<sup>+</sup>):  $m/z$  (%) 352.0 [M+H]<sup>+</sup> (98)

HRMS ( $m/z$ ): [M+H]<sup>+</sup> calcd. for C<sub>20</sub>H<sub>26</sub>N<sub>5</sub>O, 352.2132; found 352.2139

**1-cyclohexyl-6-(3-(hydroxymethyl)phenyl)-1H-imidazo[4,5-b]pyrazin-2(3H)-one (24)**

Following the method outlined in General method 3, but using 3-(hydroxymethyl)phenyl boronic acid (49 mg, 0.33 mmol), the title compound (**24**) (19 mg, 17%) was obtained as a yellow solid.

$^1\text{H}$  NMR (500 MHz, DMSO- $d_6$ ):  $\delta$  11.84 (s, 1H), 8.27 (s, 1H), 7.70 (d,  $J = 7.2$  Hz, 1H), 7.44 (s, 1H), 7.27 (t,  $J = 6.7$  Hz, 1H), 7.17 (d,  $J = 7.0$  Hz, 1H), 5.10 (s, 1H), 4.39 (d,  $J = 4.3$  Hz, 1H), 4.07 (brs, 1H), 2.16-2.11 (m, 2H), 1.69-1.61 (m, 4H), 1.52 (d,  $J = 11.2$  Hz, 1H), 1.23-1.20 (m, 2H), 1.07-1.05 (m, 1H).

LRMS (ES+):  $m/z$  (%) 325.0 [M+H]<sup>+</sup> (100)

HRMS ( $m/z$ ): [M+H]<sup>+</sup> calcd. for C<sub>18</sub>H<sub>21</sub>N<sub>4</sub>O<sub>2</sub>, 325.1659; found 325.1668

**N-(3-(3-cyclohexyl-2-oxo-2,3-dihydro-1H-imidazo[4,5-b]pyrazin-5-yl)phenyl)acetamide (25)**

Following the method outlined in General method 3, but using 3-phenylacetamide boronic acid (58 mg, 0.33 mmol), the title compound (**25**) (29 mg, 24%) was obtained as a yellow solid.

<sup>1</sup>H NMR (500 MHz, DMSO-*d*<sub>6</sub>): δ 12.05 (s, 1H), 10.08 (s, 1H), 8.38 (s, 1H), 8.24 (s, 1H), 7.67-7.64 (m, 2H), 7.41 (t, *J* = 7.9 Hz, 1H), 4.28-4.22 (m, 1H), 2.39-2.32 (m, 2H), 1.89-1.80 (m, 4H), 1.71 (d, *J* = 12.2 Hz, 1H), 1.44-1.29 (m, 3H).

LRMS (ES+):  $m/z$  (%) 352.2 [M+H]<sup>+</sup> (100)

HRMS ( $m/z$ ): [M+H]<sup>+</sup> calcd. for C<sub>19</sub>H<sub>22</sub>FN<sub>5</sub>O<sub>2</sub>, 352.1768; found 352.1774

**1-cyclohexyl-6-(2-fluorophenyl)-1H-imidazo[4,5-b]pyrazin-2(3H)-one (26)**

Following the method outlined in General method 3, but using 2-fluoro boronic acid (40 mg, 0.33 mmol), the title compound (**26**) (46 mg, 44%) was obtained as a pale yellow solid.

<sup>1</sup>H NMR (500 MHz, DMSO-*d*<sub>6</sub>): δ 12.12 (s, 1H), 8.30 (s, 1H), 7.93-7.90 (m, 1H), 7.47 (brs, 1H), 7.40-7.34 (m, 2H), 4.11 (d, *J* = 4.5 Hz, 1H), 2.37-2.27 (m, 2H), 1.86-1.80 (m, 4H), 1.69 (d, *J* = 12.3 Hz, 1H), 1.40-1.38 (m, 2H), 1.25-1.21 (m, 1H).

LRMS (ES+):  $m/z$  (%) 313.1 [M+H]<sup>+</sup> (100)

HRMS ( $m/z$ ): [M+H]<sup>+</sup> calcd. for C<sub>17</sub>H<sub>18</sub>FN<sub>4</sub>O, 313.1459; found 313.1461

**1-cyclohexyl-6-(2-methoxyphenyl)-1H-imidazo[4,5-b]pyrazin-2(3H)-one (27)**

Following the method outlined in General method 3, but using 2-methoxyphenyl boronic acid (56 mg, 0.33 mmol), the title compound (**27**) (22 mg, 19%) was obtained as a yellow solid.

<sup>1</sup>H NMR (500 MHz, DMSO-*d*<sub>6</sub>): δ 12.08 (s, 1H), 8.09 (s, 1H), 7.59-7.41 (m, 4H), 4.26-4.20 (m, 1H), 3.35 (s, 3H), 2.30-2.23 (m, 2H), 1.85-1.80 (m, 4H), 1.68 (d, *J* = 12.3 Hz, 1H), 1.42-1.34 (m, 2H), 1.23-1.15 (m, 1H).

**1-cyclohexyl-6-(2-(hydroxymethyl)phenyl)-1H-imidazo[4,5-b]pyrazin-2(3H)-one (28)**

Following the method outlined in General method 3, but using 2-methoxyphenyl boronic acid (55 mg, 0.33 mmol), the title compound (**28**) (58 mg, 53%) was obtained as a pale yellow solid.

<sup>1</sup>H NMR ((500 MHz, DMSO-*d*<sub>6</sub>): δ 12.06 (s, 1H), 8.09 (s, 1H), 7.66 (d, *J* = 7.0 Hz, 1H), 7.46-7.44 (m, 2H), 7.39-7.36 (m, 1H), 5.16 (s, 1H), 4.65 (d, *J* = 4.0 Hz, 2H), 4.23-4.19 (m, 1H), 2.29-2.22 (m, 2H), 1.84-1.78 (m, 4H), 1.67 (d, *J* = 11.2 Hz, 1H), 1.38-1.35 (m, 2H), 1.22-1.17 (m, 1H).

LRMS (ES+): *m/z* (%) 325.0 [M+H]<sup>+</sup> (100)

HRMS (*m/z*): [M+H]<sup>+</sup> calcd. for C<sub>18</sub>H<sub>21</sub>N<sub>4</sub>O<sub>2</sub>, 325.1659; found 325.1651

**1-cyclohexyl-6-(pyridin-4-yl)-1H-imidazo[4,5-b]pyrazin-2(3H)-one (29)** Following the method outlined in General method 3, but using 4-pyridylboronic acid (41 mg, 0.33 mmol), the title compound (**29**) (7 mg, 7%) was obtained as a yellow solid.

<sup>1</sup>H NMR (500 MHz, DMSO-*d*<sub>6</sub>): δ 12.22 (s, 1H), 8.69-8.68 (m, 3H), 8.04-8.03 (m, 2H), 4.30-4.23 (m, 1H), 2.37-2.29 (m, 2H), 1.89-1.81 (m, 4H), 1.72 (d, *J* = 12.4 Hz, 1H), 1.45-1.37 (m, 2H), 1.32-1.24 (m, 1H).

**1-cyclohexyl-6-(pyridin-3-yl)-1H-imidazo[4,5-b]pyrazin-2(3H)-one (30)** Following the method outlined in General method 3, but using 3-pyridyl boronic acid (41 mg, 0.33 mmol), the title compound (**30**) (13 mg, 13%) was obtained as a yellow solid.

<sup>1</sup>H NMR (500 MHz, DMSO-*d*<sub>6</sub>): δ 12.13 (s, 1H), 9.23 (s, 1H), 8.61-8.58 (m, 2H), 8.39 (d, *J* = 7.5 Hz, 1H), 7.53 (s, 1H), 4.28-4.24 (m, 1H), 2.37-2.29 (m, 2H), 1.88-1.81 (m, 4H), 1.71 (d, *J* = 12.1 Hz, 1H), 1.42-1.37 (m, 2H), 1.30-1.25 (m, 1H).

LRMS (ES+): *m/z* (%) 296.2 [M+H]<sup>+</sup> (100)

**(R)-1-(1-phenylethyl)-1H-imidazo[4,5-b]pyrazin-2(3H)-one (16)** To a mixture of (R)-6-bromo-1-(1-phenylethyl)-1H-imidazo[4,5-b]pyrazin-2(3H)-one (100 mg, 0.31 mmol) in MeOH/DCM (8:2, 10.0 mL) at room temperature was added 5% Pd/C (30.0 mg), the mixture

degassed and placed under an atmosphere of nitrogen gas. The mixture was degassed, placed under an atmosphere of hydrogen gas, and stirred vigorously for 17 hours. The reaction was then filtered through a celite pad, the pad washed with DCM (20 mL), MeOH (20 mL) and filtrate concentrated *in vacuo*. The crude solid was triturated with 1:1 hexane/diethyl ether, filtered and dried *in vacuo* to give the title compound (**16**) (11 mg, 15%) as an off-white solid.

<sup>1</sup>H NMR (300 MHz, DMSO-*d*<sub>6</sub>): 7.65 (brs, 1H), 7.53 (brs, 1H), 7.38 (d, 2H, *J* = 4.5 Hz), 7.30 (t, 2H, 4.4 Hz), 7.22 (t, 2H, 4.4 Hz), 5.62 (q, 1H, 4.4 Hz), 4.13 (brs, 1H), 1.90 (d, 2H, *J* = 4.4 Hz).

HRMS (*m/z*): [M+H]<sup>+</sup> calcd. for C<sub>13</sub>H<sub>13</sub>N<sub>4</sub>O, 241.1084; found 241.1092.

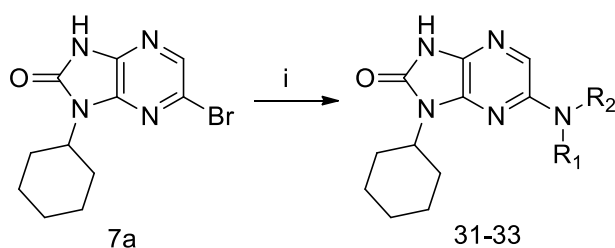

**Scheme 2:** i. Pd<sub>2</sub>dba<sub>3</sub> (5 mol%), amine (2 eq.), Rac-Binap (10 mol%), KO<sup>t</sup>Bu, 1,4-dioxane, 160 °C, μW, 20 mins., 5-24%

#### 1-cyclohexyl-6-(piperidin-1-yl)-1H-imidazo[4,5-b]pyrazin-2(3H)-one (**31**) (General method 4)

6-bromo-1-cyclohexyl-1H-imidazo[4,5-b]pyrazin-2(3H)-one (100 mg, 0.33 mmol), tris(dibenzylideneacetone)dipalladium (16 mg, 0.017 mmol), potassium *tert*-butoxide (114 mg, 1.0 mmol), (+/-)-2,2'-bis(diphenylphosphino)-1,1'-binaphthyl (22 mg, 0.034 mmol), piperidine (67 μl, 0.68 mmol) and 1,4-dioxane (2.0 mL) were combined, heated under microwave irradiation at 180 °C for 5 minutes. The reaction was cooled to room temperature, absorbed onto silica and purified by column chromatography, eluting with 50% EtOAc /hexane to give the title compound (**31**) (25 mg, 24%) as a yellow solid.

<sup>1</sup>H NMR (500 MHz, DMSO-*d*<sub>6</sub>): δ 11.36 (s, 1H), 7.45 (s, 1H), 4.16-4.09 (m, 1H), 3.38-3.32 (m, 2H), 2.52-2.50 (m, 2H), 2.27-2.19 (m, 2H), 1.83 (d, *J* = 13.0 Hz, 2H), 1.73-1.67 (m, 3H), 1.59 (brs, 6H), 1.39-1.31 (m, 2H), 1.21-1.13 (m, 1H).

LRMS (ES<sup>+</sup>): *m/z* (%) 302.2 [M+H]<sup>+</sup> (100)

HRMS (*m/z*): [M+H]<sup>+</sup> calcd. for C<sub>16</sub>H<sub>24</sub>N<sub>5</sub>O, 302.1975; found 302.1973

### **1-cyclohexyl-6-morpholino-1H-imidazo[4,5-b]pyrazin-2(3H)-one (32)**

Following the method outlined in General method 4, but using morpholine (59 mg, 0.68 mmol), the title compound (**32**) (13 mg, 13%) was obtained as a pale yellow solid.

<sup>1</sup>H NMR (500 MHz, DMSO-*d*<sub>6</sub>): δ 11.46 (s, 1H), 7.46 (s, 1H), 4.16-4.11 (m, 1H), 3.76-3.74 (m, 4H), 3.34-3.32 (m, 4H), 2.26-2.19 (m, 2H), 1.83 (d, *J* = 13.0 Hz, 2H), 1.73-1.66 (m, 3H), 1.39-1.31 (m, 2H), 1.23-1.17 (m, 1H).

LRMS (ES<sup>+</sup>): *m/z* (%) 304.2 [M+H]<sup>+</sup> (100)

HRMS (*m/z*): [M+H]<sup>+</sup> calcd. for C<sub>15</sub>H<sub>22</sub>N<sub>5</sub>O<sub>2</sub>, 304.1768; found 304.1771

### **1-cyclohexyl-6-(4-methylpiperazin-1-yl)-1H-imidazo[4,5-b]pyrazin-2(3H)-one (33)**

Following the method outlined in General method 4, but using N-methylpiperazine (75 μl, 0.68 mmol), the title compound (**33**) (5 mg, 5%) was obtained as a grey solid.

<sup>1</sup>H NMR (500 MHz, DMSO-*d*<sub>6</sub>): δ 11.42 (s, 1H), 7.46 (s, 1H), 4.13 (brs, 1H), 2.44 (s, 2H), 2.22 (s, 3H), 1.83 (d, *J* = 12.2 Hz, 2H), 1.73-1.66 (m, 3H), 1.39-1.31 (m, 2H), 1.22-1.17 (m, 1H). (missing 2 protons due to overlap with solvent)

LRMS (ES<sup>+</sup>): *m/z* (%) 317.1 [M+H]<sup>+</sup> (100)

HRMS (*m/z*): [M+H]<sup>+</sup> calcd. for C<sub>16</sub>H<sub>25</sub>N<sub>6</sub>O, 317.2084; found 317.2089

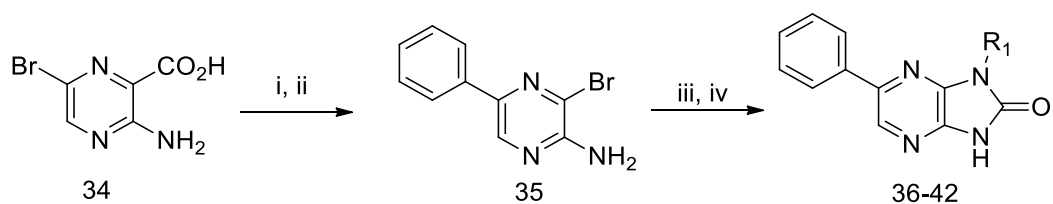

**Scheme 3** i) phenylboronic acid, Pd(PPh<sub>3</sub>)<sub>4</sub>, K<sub>2</sub>CO<sub>3</sub> (2M sol<sup>n</sup>), DMF,  $\mu$ W, 140 °C, 10 min, 100%; ii) NaOAc, AcOH, Br<sub>2</sub>, rt, 16 h, 63%; iii) Amine, DIPEA, n-BuOH,  $\mu$ W, 220°C, 1h; iv) CDI, dioxane,  $\mu$ W, 130 °C, 10 min, 2-71% for 2 steps.

### 3-Bromo-5-phenylpyrazine-2-amine (35)

3-Amino-6-bromopyrazine-2-carboxylic acid **34** (1.7 g, 8 mmol), DMF (6 mL), potassium carbonate (6 mL of a 2M solution in water, 12 mmol), tetrakis(triphenylphosphine)palladium (0) (10 mg, 0.008 mmol) and phenyl boronic acid were added sequentially to a 20 mL process vial and heated under microwave irradiation at 140 °C for 10 minutes. Two reactions were performed on this scale and combined to be worked up (16 mmol total reaction scale). The reaction mixture was partitioned between EtOAc and water, the organic layer washed (water, 2 x 20 mL) and the aqueous layer acidified to pH 4 with hydrochloric acid (10% v/v). A yellow precipitate was obtained which was re-dissolved in DCM and washed (water, 2 x 20 mL), the organic layer was dried over MgSO<sub>4</sub>, filtered and the solvent removed *in vacuo* to give 3-Amino-6-phenylpyrazine-2-carboxylic acid (4 g, 100%) as a pale yellow solid.

<sup>1</sup>H NMR (500 MHz, MeOD)  $\delta$  8.78 (s, 1H), 8.04-8.02 (m, 2H), 7.48 (t,  $J$  = 7.9 Hz, 2H), 7.40 (tt,  $J$  = 7.1 and 1.2 Hz, 1H).

LRMS (ES<sup>+</sup>):  $m/z$  (%) 216.0 [M+H]<sup>+</sup> (100)

3-Amino-6-phenylpyrazine-2-carboxylic acid (4 g, 16 mmol) and sodium acetate (2.7 g, 33 mmol) were stirred in acetic acid (30 mL) at rt for 30 min, bromine (0.93 mL, 18 mmol) in acetic acid (10 mL) was added drop wise over a period of 30 mins and the reaction stirred for 16 h. The reaction was quenched with water to give a tan precipitate which was collected and dried in a freeze drier to give the title compound **35** (2.52 g, 63%) as a tan solid.

<sup>1</sup>H NMR (500 MHz, DMSO-*d*<sub>6</sub>):  $\delta$  8.62 (s, 1H), 7.96 (d,  $J$  = 7.3 Hz, 2H), 7.46 (t,  $J$  = 7.3 Hz, 1H), 7.37 (t,  $J$  = 7.3 Hz, 2H), 6.90 (brs, 2H).

LRMS (ES<sup>+</sup>):  $m/z$  (%) 250.0 [<sup>79</sup>Br M+H]<sup>+</sup>, (100), 252.0 [<sup>81</sup>Br M+H]<sup>+</sup> (98)



### 1-Isopropyl-6-phenyl-1*H*-imidazo[4,5-*b*]pyrazin-2(3*H*)-one (36) (General method 5)

3-Bromo-5-phenylpyrazine-2-amine (0.5 mmol), isopropylamine (61  $\mu$ L, 44 mg, 0.75 mmol), DIPEA (0.1 mL) and <sup>n</sup>BuOH (0.5 mL) were heated under microwave irradiation at 220 °C for 1 hour. The reaction was diluted with EtOAc (10 mL), washed with H<sub>2</sub>O (3 x 10 mL), the organic layer dried over MgSO<sub>4</sub>, filtered and the solvent removed *in vacuo*. Column chromatography eluting with DCM to DCM:MeOH (95:5) afforded the desired substituted 6-phenylpyrazine-2,3-diamine that was reacted on without further purification. Substituted 6-phenylpyrazine-2,3-diamine (0.5 mmol), CDI (0.6 mmol) and 1,4-dioxane (1 mL) were heated under microwave irradiation at 130 °C for 10 minutes. The crude reaction mixture was partitioned between EtOAc and water, the organic layer dried over MgSO<sub>4</sub>, filtered and the solvent removed *in vacuo*. The resultant crude residue was purified by column chromatography, eluting with EtOAc to give the title compound (36) (13 mg, 10%) as a colourless solid.

<sup>1</sup>H NMR (500 MHz, DMSO-*d*<sub>6</sub>):  $\delta$  12.00 (brs, 1H), 8.50 (s, 1H), 8.04 (d, *J* = 7.3 Hz, 2H), 7.51 (t, *J* = 7.3 Hz, 2H), 7.44-7.39(m, 1H), 4.69 (sep, *J* = 6.8 Hz, 1H), 1.57 (d, *J* = 6.8 Hz, 6H).

LRMS (ES<sup>+</sup>): *m/z* (%) 255.1 [M+H]<sup>+</sup> (100)

### 1,6-Diphenyl-1*H*-imidazo[4,5-*b*]pyrazin-2(3*H*)-one (37)

Following the method outlined in General method 5, but using aniline (68  $\mu$ L, 70 mg, 0.75 mmol), the title compound (37) (3 mg, 2%) was obtained as a pale yellow solid.

<sup>1</sup>H NMR (500 MHz, CDCl<sub>3</sub>):  $\delta$  8.26 (brs, 1H), 7.69 (s, 1H), 7.47 (brs, 4H), 7.24 (m, 1H), 6.89 (brs, 5H)

LRMS (ES<sup>+</sup>): *m/z* (%) 290.1 [M+H]<sup>+</sup> (100)

### 6-Phenyl-1-(tetrahydro-2*H*-pyran-4-yl)-1*H*-imidazo[4,5-*b*]pyrazin-2(3*H*)-one (38)

Following the method outlined in General method 5, but using 4-aminotetrahydropyran (81  $\mu$ L, 79 mg, 0.75 mmol), the title compound (38) (65 mg, 44%) was obtained as a beige solid.

<sup>1</sup>H NMR (500 MHz, CDCl<sub>3</sub>):  $\delta$  8.43 (s, 1H), 8.39 (brs, 1H), 8.01 (m, 2H), 7.53 (t, *J* = 7.3 Hz, 2H), 7.46 (tt, *J* = 7.3 and 1.1 Hz, 1H), 4.73-4.65 (m, 1H), 4.20 (dd, *J* = 11.0 and 4.5 Hz, 2H), 3.60 (t, *J* = 11.0 and 10.6 Hz, 2H), 2.90 (ddd, *J* = 25.0, 12.4 and 4.5 Hz, 2H), 1.84 (dd, *J* = 12.4 and 2.0 Hz, 2H)

LRMS (ES+):  $m/z$  (%) 297.2 [M+H]<sup>+</sup> (100)

### **1-(1-Methoxypropan-2-yl)-6-phenyl-1H-imidazo[4,5-b]pyrazin-2(3H)-one (39)**

Following the method outlined in General method 5, but using 1-methoxybutan-2-amine (77 mg, 0.75 mmol), the title compound (**39**) (85 mg, 60%) was obtained as a colourless solid

<sup>1</sup>H NMR (500 MHz, CDCl<sub>3</sub>): δ 8.90 (brs, 1H), 8.41 (s, 1H), 7.99-7.97-(m, 2H), 7.51 (t,  $J$  = 7.3 Hz, 2H), 7.44 (t,  $J$  = 7.3 Hz, 1H), 4.98-4.94 (m, 1H), 4.27 (t,  $J$  = 10.1 Hz, 1H), 3.68 (dd,  $J$  = 10.1 and 5.2 Hz, 1H), 3.37 (s, 3H), 1.65 (d,  $J$  = 7.1 Hz, 3H).

LRMS (ES+):  $m/z$  (%) 285.1 [M+H]<sup>+</sup> (100)

HRMS ( $m/z$ ): [MH<sup>+</sup>] calcd. For C<sub>15</sub>H<sub>16</sub>N<sub>4</sub>O<sub>2</sub>, 285.1346; found, 285.1336.

### **1-(1-Hydroxybutan-2-yl)-6-phenyl-1H-imidazo[4,5-b]pyrazin-2(3H)-one (40)**

Following the method outlined in General method 5, but using 4-aminobutanol (71 μL, 67 mg, 0.75 mmol), the title compound (**40**) (100 mg, 71%) was obtained as a colourless solid;

<sup>1</sup>H NMR (500 MHz, CDCl<sub>3</sub>): δ 7.87 (s, 1H), 7.82-7.77 (m, 2H), 7.40 (t,  $J$  = 7.3 Hz, 2H), 7.30 (t,  $J$  = 7.3 Hz, 1H), 4.14-4.09 (m, 1H), 3.86 (dd,  $J$  = 11.4 and 3.3 Hz, 1H), 3.67 (dd,  $J$  = 11.4 and 6.9 Hz, 1H), 1.77-1.62 (m, 2H), 1.03 (t,  $J$  = 7.5 Hz, 3H),

LRMS (ES+):  $m/z$  (%) 285.2 [M+H]<sup>+</sup> (100)

HRMS ( $m/z$ ): [MH<sup>+</sup>] calcd. For C<sub>15</sub>H<sub>16</sub>N<sub>4</sub>O<sub>2</sub>, 285.1346; found, 285.1334.

### **1-(2-(Dimethylamino)ethyl)-6-phenyl-1H-imidazo[4,5-b]pyrazin-2(3H)-one (41)**

Following the method outlined in General method 5, but using N<sup>1</sup>,N<sup>1</sup>-dimethylethane-1,2-diamine (66 mg, 0.75 mmol), the title compound (**41**) (10 mg, 8%) was obtained as a colourless solid;

<sup>1</sup>H NMR (500 MHz, CDCl<sub>3</sub>): δ 8.00 (s, 1H), 7.90-7.89 (m, 2H), 7.49 (t,  $J$  = 7.3 Hz, 2H), 7.44 (tt,  $J$  = 7.3 Hz, 1H), 4.21 (t,  $J$  = 5.9 Hz, 2H), 3.01 (t,  $J$  = 5.9 Hz, 2H, CH<sub>2</sub>), 2.49 (s, 6H, 2 x CH<sub>3</sub>).

LRMS (ES+):  $m/z$  (%) 284.1 [M+H]<sup>+</sup>

HRMS ( $m/z$ ): [MH<sup>+</sup>] calcd. For C<sub>15</sub>H<sub>17</sub>N<sub>5</sub>O, 284.1506; found, 284.1492.

### 1-(1-Methylpiperidin-4-yl)-6-phenyl-1*H*-imidazo[4,5-*b*]pyrazin-2(3*H*)-one (**42**)

Following the method outlined in General method 5, but using 1-methylpiperidin-4-amine (85 mg, 0.75 mmol), the title compound (**42**) (6.7 mg, 4%) was obtained as a beige solid.

<sup>1</sup>H NMR (500 MHz, MeOD): δ 8.43 (s, 1H), 8.08 (d, *J* = 7.4 Hz, 2H), 7.49 (t, *J* = 7.4 Hz, 2H), 7.41 (tt, *J* = 7.4 and 1.2 Hz, 1H), 4.44 (tt, *J* = 12.1 and 4.0 Hz, 1H), 3.11 (d, *J* = 12.1, 2H), 2.92 (dd, *J* = 12.7 and 3.7 Hz, 1H), 2.88 (dd, *J* = 12.7 and 3.7 Hz, 1H), 2.39 (s, 3H), 2.29 (td, *J* = 12.1 and 2.3 Hz, 2H), 1.90 (d, *J* = 12.1 Hz, 2H),

LRMS (ES<sup>+</sup>): *m/z* (%) 310.1 [M+H]<sup>+</sup> (100)

HRMS (*m/z*): [MH<sup>+</sup>] calcd. For C<sub>17</sub>H<sub>19</sub>N<sub>5</sub>O, 310.1662; found, 310.1671.

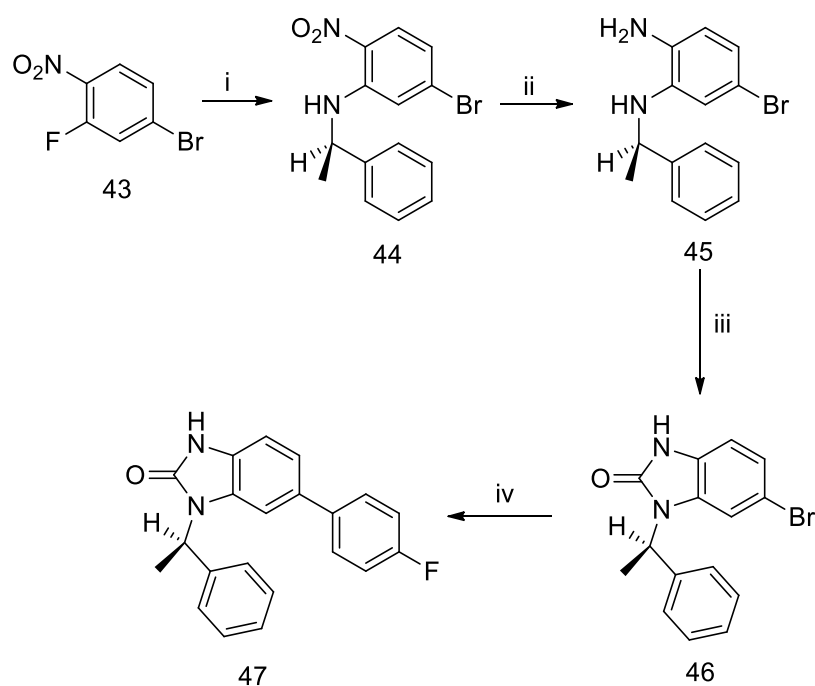

**Scheme 4:** i. (R)-Methylbenzylamine, Cs<sub>2</sub>CO<sub>3</sub>, DMF, 120 °C; ii. Charcoal 200% w/w, NaBH<sub>4</sub>, THF, Water, rt., 16 h, 34% for 2 steps; iii. CDI, 1,4-dioxane, 140 °C, 20 mins, 61%; iv. Pd(PPh<sub>3</sub>)<sub>4</sub> (5 mol%), K<sub>2</sub>CO<sub>3</sub> (1.5 M aqueous solution), boronic acid, DMF, 140 °C, 5 mins., 44%.

### **(R)-5-bromo-N1-(1-phenylethyl)benzene-1,2-diamine (45)**

4-bromo-2-fluoro-1-nitrobenzene (1g, 4.5 mmol), (R)-1-phenylethylamine (580 $\mu$ L, 4.5 mmol) and cesium carbonate (1.47g, 4.5 mmol) in DMF (4 mL) were heated under microwave irradiation at 120°C for 5 minutes. The solvent was removed *in vacuo* to give a crude residue which was taken up in EtOAc, washed (water), dried (MgSO<sub>4</sub>) and concentrated *in vacuo* to give (R)-5-bromo-2-nitro-N-(1-phenylethyl)aniline (**44**) as an orange oil. The orange oil was taken up in THF (20 mL) and water (10 mL), charcoal (3g) added and the mixture stirred for 10 minutes. Sodium borohydride (1.5g, 39.7 mmol) was added portionwise and the reaction stirred for 66 hours. The reaction mixture was filtered through a pad of celite and the filtrate concentrated *in vacuo* to give a crude residue which was purified by column chromatography, eluting with 0-100% diethyl ether/hexane, to give the title compound **45** (446 mg, 34%) as a yellow oil.

<sup>1</sup>H NMR (500 MHz, DMSO-*d*<sub>6</sub>):  $\delta$  7.36 (m, 2H), 7.31 (m, 2H), 7.20 (m, 1H), 6.43 (m, 2H), 6.20 (s, 1H), 5.16 (d, *J* = 6.5 Hz); 4.88 (s, 2H), 4.46 (m, 1H), 1.44 (d, *J* = 6.6 Hz, 3H)

### **(R)-6-bromo-1-(1-phenylethyl)-1H-benzo[d]imidazol-2(3H)-one (46)**

(R)-5-bromo-N1-(1-phenylethyl)benzene-1,2-diamine (**45**) (446 mg, 1.53 mmol), and CDI (300 mg, 1.85 mmol) in 1,4-dioxane (5 mL) was heated under microwave irradiation at 140°C for 20 minutes. The solvent was removed *in vacuo* to give a crude residue which was purified by column chromatography, eluting with 0-100% diethyl ether/Pet. Ether 40-60°C to give the title compound **46** (297 mg, 61%) as a pale orange solid.

<sup>1</sup>H NMR (500 MHz, DMSO-*d*<sub>6</sub>): 11.16 (s, 1H), 7.36 (m, 4H), 7.30 (m, 1H), 7.10 (dd, *J* = 1.7 and 8.3 Hz, 1H), 6.99 (d, *J* = 1.8 Hz, 1H), 6.94 (d, *J* = 8.3 Hz, 1H), 5.66 (q, *J* = 7.1 Hz, 1H), 1.81 (d, *J* = 7.3 Hz, 6H).

LRMS (ES<sup>+</sup>): *m/z* (%) 317.0 [<sup>79</sup>Br M+H]<sup>+</sup> (98), 319.0 [<sup>81</sup>Br M+H]<sup>+</sup> (100)

HRMS (*m/z*): [M+H]<sup>+</sup> calcd. for C<sub>15</sub>H<sub>14</sub><sup>79</sup>BrN<sub>2</sub>O, 317.0284; found 317.0286

**(R)-6-(4-fluorophenyl)-1-(1-phenylethyl)-1H-benzo[d]imidazol-2(3H)-one (47)**

(R)-6-bromo-1-(1-phenylethyl)-1H-benzo[d]imidazol-2(3H)-one (**46**) (95 mg, 0.3 mmol), phenyl boronic acid (46 mg, 0.33 mmol), tetrakis(triphenylphosphine)palladium (0) (17 mg, 0.015 mmol), potassium carbonate (0.6 mL mL of a 1.5 M aqueous solution, 0.9 mmol), and DMF (2 mL mL) were combined and heated under microwave irradiation at 140 °C for 5 mins. The reaction mixture was concentrated *in vacuo* to give a crude residue which was purified by column chromatography, eluting with 0-100% diethyl ether/petroleum ether 40-60°C to give the title compound **47** (44 mg, 44%) as a pale orange solid.

<sup>1</sup>H NMR (500 MHz, DMSO-*d*<sub>6</sub>): 11.01 (s, 1H), 7.51 (m, 2H), 7.41 (m, 2H), 7.36 (m, 2H), 7.27 (m, 1H), 7.21 (m, 3H), 7.05 (d, *J* = 8.1 Hz, 1H), 7.03 (d, *J* = 1.5 Hz, 1H), 5.73 (q, *J* = 7.3 Hz, 1H), 1.88 (d, *J* = 7.3 Hz, 6H).

LRMS (ES<sup>+</sup>): *m/z* (%) 333.2 [M+H]<sup>+</sup> (100)

HRMS (*m/z*): [M+H]<sup>+</sup> calcd. for C<sub>21</sub>H<sub>18</sub>FN<sub>2</sub>O, 333.1398; found 333.1410

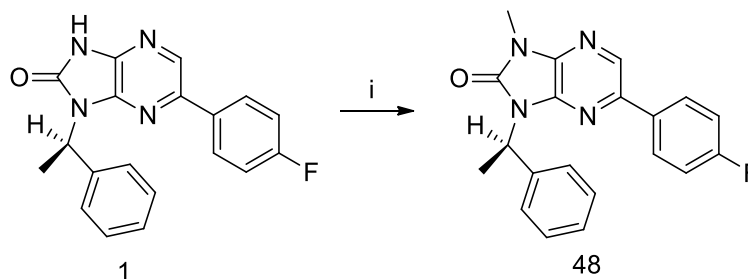

**Scheme 5:** i. NaH (60% w/w in mineral oil, 1.1 eq.), MeI (1.5 eq.), DMF, rt. 3 h, 38%.

**(R)-5-(4-fluorophenyl)-1-methyl-3-(1-phenylethyl)-1H-imidazo[4,5-b]pyrazin-2(3H)-one (48)**

To a stirred suspension of 60% sodium hydride (7 mg, 0.17 mmol) in DMF (1 mL) under an inert atmosphere, was added (R)-6-(4-fluorophenyl)-1-(1-phenylethyl)-1H-imidazo[4,5-b]pyrazin-2(3H)-one (**1**) (50 mg, 0.15 mmol) in DMF (1 mL) and the reaction was stirred for 20 minutes. Iodomethane (14 μL, 0.23 mmol) was added to the reaction mixture and stirring continued for 4 hours. The reaction mixture was then concentrated *in vacuo* to give a crude

residue which was purified by column chromatography, eluting with 0-100% diethyl ether/Pet. Ether 40-60°C to give the title compound **48** (20 mg, 38%) as an off-white solid.

<sup>1</sup>H NMR (500 MHz, DMSO-*d*<sub>6</sub>): 8.58 (s, 1H), 8.06 (m, 2H), 7.51 (d, *J* = 7.7 Hz, 2H), 7.36-7.24 (m, 5H), 5.79 (q, *J* = 7.3 Hz, 1H), 2.02 (d, *J* = 7.3 Hz, 6H).

LRMS (ES<sup>+</sup>): *m/z* (%) 349.2 [M+H]<sup>+</sup> (100)

HRMS (*m/z*): [M+H]<sup>+</sup> calcd. for C<sub>20</sub>H<sub>18</sub>FN<sub>4</sub>O, 349.1459; found 349.1455

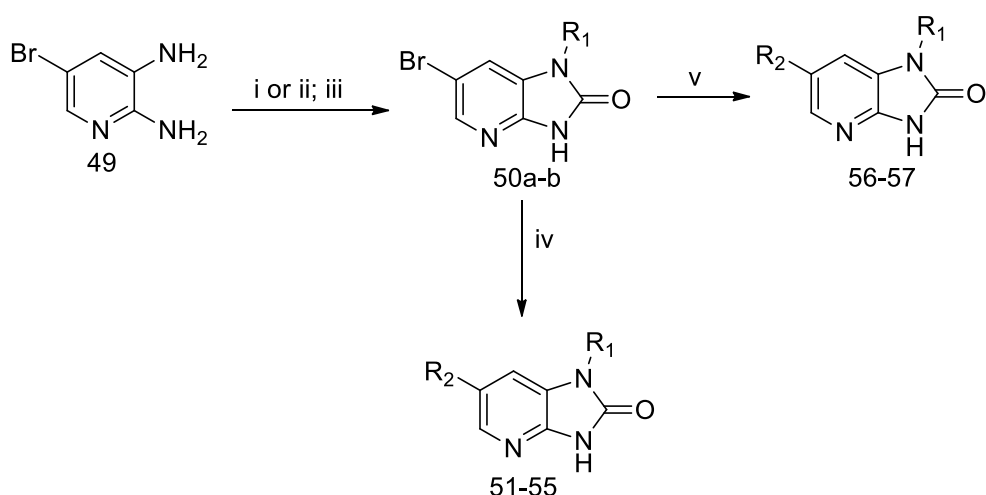

**Scheme 6:** i) a) Cyclohexanone, AcOH, DCM; b) Na(OAc)<sub>3</sub>BH, 63%; c) CDI, MeCN, 75% ii) a) PhC(CH<sub>3</sub>)<sub>2</sub>Cl, Et<sub>3</sub>N, THF; 9% b) CDI, MeCN, 69%; iii) ArB(OR)<sub>2</sub>, K<sub>3</sub>PO<sub>4</sub>, Pd(PPh<sub>3</sub>)<sub>4</sub>, DMF:H<sub>2</sub>O (3:1), 130°C, mw, 3-69%; v) S-PHOS, NaOtBu, (R<sup>2</sup>)<sub>2</sub>NH, Pd<sub>2</sub>dba<sub>3</sub>, toluene, 120°C, mw, 37-43%

### 6-bromo-1-cyclohexyl-1H-imidazo[4,5-b]pyridin-2(3H)-one **50a**

To a stirred suspension of 2,3-amino-5-bromopyridine (2.82g, 15 mmol) in DCM (30 mL) was added cyclohexanone (1.55 mL, 15 mmol) and acetic acid (0.86 mL, 15 mmol) and the reaction stirred for 1 hour. To the reaction mixture was added sodium triacetoxyborohydride (4.77g, 22.5 mmol) and the reaction stirred overnight. The reaction mixture was washed (saturated sodium bicarbonate solution), dried (MgSO<sub>4</sub>) and concentrated *in vacuo* to give a crude residue which was purified by column chromatography, eluting with 0-100%

EtOAc/DCM to give 5-bromo-N3-cyclohexylpyridine-2,3-diamine (2.54g, 63%) as a pale purple solid.

$^1\text{H}$  NMR (500 MHz, DMSO- $d_6$ ):  $\delta$  7.25 (d,  $J$  = 2.0 Hz, 1H), 6.63 (d,  $J$  = 2.0 Hz, 1H), 5.72 (s, 2H), 4.77 (d,  $J$  = 7.5 Hz, 1H), 3.19 (m, 1H), 1.93 (m, 2H), 1.73 (m, 2H), 1.62 (m, 1H), 1.35 (m, 2H), 1.17 (m, 3H).

LRMS (ES+):  $m/z$  (%) 270.0 [ $^{79}\text{Br}$  M+H] $^+$  (100), 272.0 [ $^{81}\text{Br}$  M+H] $^+$  (98)

To a stirred solution of 5-bromo-N3-cyclohexylpyridine-2,3-diamine (168-012-001) (2.54g, 9.41 mmol) in MeCN (60 mL) was added CDI (6.1g, 37.6 mmol) and the reaction was stirred overnight. The solvent was removed *in vacuo* to give a crude residue which was triturated (water, diethyl ether) and dried *in vacuo* to give the title compound (**50a**) (2.08g, 75%) as a white solid.

$^1\text{H}$  NMR (500 MHz, DMSO- $d_6$ ):  $\delta$  11.72 (brs, 1H), 7.99 (d,  $J$  = 1.9 Hz, 1H), 7.40 (d,  $J$  = 1.9 Hz, 1H), 4.14 (m, 1H), 2.06 (m, 2H), 1.82 (m, 2H), 1.70 (m, 2H), 1.64 (m, 1H), 1.17 (m, 3H).

LRMS (ES+):  $m/z$  (%) 296.0 [ $^{79}\text{Br}$  M+H] $^+$  (100) 298.0 [ $^{81}\text{Br}$  M+H] $^+$  (95)

### **6-bromo-1-(2-phenylpropan-2-yl)-1H-imidazo[4,5-b]pyridin-2(3H)-one 50b**

To a stirred suspension of 2,3-amino-5-bromopyridine (1.13g, 6 mmol) in THF (20 mL) was added  $\alpha,\alpha$ -dimethylbenzyl chloride (1.02g, 6.6 mmol) and triethylamine (1.69 mL, 12 mmol) and the reaction was stirred for 66 hours. The solvent was removed *in vacuo* to give a crude residue which was purified by column chromatography, eluting with 0-40% EtOAc/hexane to give 5-bromo-N3-(2-phenylpropan-2-yl)pyridine-2,3-diamine (168 mg, 9%) as an off-white solid.

$^1\text{H}$  NMR (500 MHz, CDCl $_3$ ):  $\delta$  7.55 (d,  $J$  = 2.0 Hz, 1H), 7.43 (m, 1H), 7.42 (m, 1H), 7.37 (m, 2H), 7.29 (m, 1H), 6.32 (d,  $J$  = 2.0 Hz, 1H), 4.17 (brs, 2H), 3.78 (brs, 1H), 1.70 (s, 6H)

LRMS (ES+):  $m/z$  (%) 306.0 [ $^{79}\text{Br}$  M+H] $^+$  (100), 308.0 [ $^{81}\text{Br}$  M+H] $^+$  (98)

To a stirred solution of 5-bromo-N3-(2-phenylpropan-2-yl)pyridine-2,3-diamine (168-004-001) (168 mg, 0.55 mmol) in MeCN (6 mL) was added CDI (267 mg, 1.65 mmol) and the reaction was stirred overnight. The solvent was removed *in vacuo* to give a crude residue which was triturated (water, diethyl ether) and dried *in vacuo* to give the title compound (**50b**) (127 mg, 69%) as a white solid.

$^1\text{H}$  NMR (500 MHz,  $\text{DMSO-}d_6$ ):  $\delta$  11.77 (brs, 1H), 7.89 (m); 7.40 (m, 4H), 7.35 (m, 1H), 6.32 (m, 1H), 1.98 (s, 6H)

LRMS (ES+):  $m/z$  (%) 332.0 [ $^{79}\text{Br}$  M+H] $^+$  (100), 334.0 [ $^{81}\text{Br}$  M+H] $^+$  (98).

### **1-cyclohexyl-6-phenyl-1H-imidazo[4,5-b]pyridin-2(3H)-one (51) (General method 6)**

A capped process vial containing 6-bromo-1-cyclohexyl-1H-imidazo[4,5-b]pyridin-2(3H)-one (148 mg, 0.5 mmol), benzenboronic acid pinacol ester (130 mg, 0.55mmol), potassium phosphate (0.55 mL of a 1M solution in water, 0.55 mmol) and tetrakis(triphenylphosphine)palladium (0) (29 mg, 5mol%) in DMF (2 mL) was degassed, flooded with argon and heated under microwave irradiation at 130°C for 30 minutes. The reaction was diluted with DCM, washed (water, brine) and concentrated *in vacuo*. The resultant crude residue was purified by column chromatography, eluting with 0-20% methanol/DCM, followed by reverse-phase HPLC, to give the title compound (**51**) (45.3 mg, 31%) as a white solid.

$^1\text{H}$  NMR (500 MHz,  $\text{DMSO-}d_6$ ): $\delta$  11.53 (brs, 1H), 8.18 (d,  $J$  = 1.9 Hz, 1H), 7.82 (d,  $J$  = 1.9 Hz, 1H), 7.71 (m, 2H), 7.49 (m, 2H), 7.38 (m, 1H), 4.23 (m, 1H), 2.16 (m, 2H), 1.85 (m, 2H), 1.73 (m, 2H), 1.67 (m, 1H), 1.38 (m, 3H).

LRMS (ES+):  $m/z$  (%) 294.2 [M+H] $^+$  (100)

HRMS ( $m/z$ ): [MH+] $^+$  calcd for  $\text{C}_{18}\text{H}_{20}\text{N}_3\text{O}$ , 294.1601; found 294.1587

### **1-(2-phenylpropan-2-yl)-6-(pyridin-3-yl)-1H-imidazo[4,5-b]pyridin-2(3H)-one (52)**

Following the method outlined in General method 6, but using 6-bromo-1-(2-phenylpropan-2-yl)-1H-imidazo[4,5-b]pyridin-2(3H)-one (63 mg, 0.191 mmol) and 3-pyridineboronic acid (26 mg, 0.21 mmol), the title compound (**52**) (5.3 mg, 3%) was obtained as a white solid.

$^1\text{H}$  NMR (500 MHz,  $\text{DMSO-}d_6$ ):  $\delta$  11.68 (brs, 1H), 8.50 (dd,  $J$  = 1.4 and 3.5 Hz, 1H), 8.47 (d,  $J$  = 2.1 Hz, 1H), 7.72 (m, 1H), 7.46 (m, 2H), 7.41 (m, 3H), 7.34 (m, 1H), 6.41 (d,  $J$  = 1.9 Hz); 2.06 (s, 6H)

LRMS (ES+):  $m/z$  (%) 331.1 [M+H] $^+$  (100)

HRMS ( $m/z$ ): [MH+] $^+$  calcd for  $\text{C}_{20}\text{H}_{19}\text{N}_4\text{O}$ , 331.1553; found 331.1540



### **1-cyclohexyl-6-(2-(hydroxymethyl)phenyl)-1H-imidazo[4,5-b]pyridin-2(3H)-one (53)**

Following the method outlined in General method 6, but using (2-hydroxymethyl)benzeneboronic acid (84 mg, 0.55 mmol), the title compound (**53**) (112 mg, 69%) was obtained as a yellow solid.

<sup>1</sup>H NMR (500 MHz, DMSO-*d*<sub>6</sub>): δ 11.61 (brs, 1H), 7.88 (d, *J* = 1.7 Hz, 1H), 7.73 (d, *J* = 1.7 Hz, 1H), 7.58 (d, *J* = 7.5 Hz, 1H), 7.41 (m, 1H), 7.36 (m, 1H), 7.1 (m, 1H), 5.19 (t, *J* = 5.2 Hz); 4.42 (d, *J* = 5.2 Hz); 4.21 (m, 1H), 2.09 (m, 2H), 1.83 (m, 2H), 1.74 (m, 2H), 1.63 (m, 1H), 1.35 (m, 3H).

LRMS (ES<sup>+</sup>): *m/z* (%) 324.2 [M+H]<sup>+</sup> (100)

HRMS (*m/z*): [MH<sup>+</sup>] calcd for C<sub>19</sub>H<sub>22</sub>N<sub>3</sub>O<sub>2</sub>, 324.1707; found 324.1693

### **6-(2-(hydroxymethyl)phenyl)-1-(2-phenylpropan-2-yl)-1H-imidazo[4,5-b]pyridin-2(3H)-one (54)**

Following the method outlined in General method 6, but using 6-bromo-1-(2-phenylpropan-2-yl)-1H-imidazo[4,5-b]pyridin-2(3H)-one (63 mg, 0.191 mmol) and 2-(hydroxymethyl)phenylboronic acid (32 mg, 0.21 mmol), the title compound (**54**) (5.3 mg, 3%) was obtained as a white solid.

<sup>1</sup>H NMR (500 MHz, DMSO-*d*<sub>6</sub>): δ 11.59 (brs, 1H), 7.80 (d, *J* = 1.8 Hz); 7.48 (d, *J* = 7.6 Hz, 1H), 7.41-7.20 (m, 7H), 6.98 (dd, *J* = 1.1 and 7.6 Hz, 1H), 6.38 (d, *J* = 1.9 Hz); 5.02 (t, *J* = 5.5 Hz, 1H), 4.11 (d, *J* = 5.3 Hz, 2H), 2.00 (s, 6H)

LRMS (ES<sup>+</sup>): *m/z* (%) 360.2 [M+H]<sup>+</sup> (100)

### **1-cyclohexyl-6-(pyridin-3-yl)-1H-imidazo[4,5-b]pyridin-2(3H)-one (55)**

Following the method outlined in General method 6, but using 3-pyridineboronic acid (37 mg, 0.55 mmol), the title compound (**55**) (95 mg, 68%) was obtained as a yellow solid.

<sup>1</sup>H NMR (500 MHz, DMSO-*d*<sub>6</sub>): δ 11.66 (brs, 1H), 8.95 (dd, *J* = 0.7 and 1.7 Hz, 1H), 8.59 (dd, *J* = 1.5 and 3.3 Hz, 1H), 8.25 (d, *J* = 1.9 Hz, 1H), 8.14 (m, 1H), 7.93 (d, *J* = 1.9 Hz, 1H), 7.50 (m, 1H), 4.23 (m, 1H), 2.19 (m, 2H), 1.86 (m, 2H), 1.74 (m, 2H), 1.66 (m, 1H), 1.39 (m, 3H).

LRMS (ES<sup>+</sup>): *m/z* (%) 295.1 [M+H]<sup>+</sup> (100)

HRMS (*m/z*): [MH<sup>+</sup>] calcd for C<sub>17</sub>H<sub>19</sub>N<sub>4</sub>O, 295.1553; found 295.1541

**1-cyclohexyl-6-(piperidin-1-yl)-1H-imidazo[4,5-b]pyridin-2(3H)-one (56) (General method 7)**

A capped process vial containing 6-bromo-1-cyclohexyl-1H-imidazo[4,5-b]pyridin-2(3H)-one (148 mg, 0.5 mmol), piperidine (99 μL, 1 mmol), tris(dibenzylideneacetone)dipalladium(0) (46 mg, 10 mol%), (*S*)-PHOS (41 mg, 0.1 mmol) and sodium *t*-butoxide (144 mg, 1.5 mmol) in toluene (4 mL) was heated under microwave irradiation at 120 °C for 20 minutes. The reaction was diluted with DCM, washed (saturated sodium bicarbonate) and concentrated *in vacuo*. The resultant crude residue was purified by column chromatography on KP-NH silica, eluting with 0-10% MeOH/EtOAc, followed by reverse-phase HPLC, to give the title compound (**56**) (65 mg, 43%) as a white solid.

<sup>1</sup>H NMR (500 MHz, DMSO-*d*<sub>6</sub>): δ 11.13 (brs, 1H), 7.54 (d, *J* = 2.2 Hz, 1H), 7.25 (d, *J* = 2.2 Hz); 4.13 (m, 1H), 3.05 (m, 4H), 2.08 (m, 2H), 1.83 (m, 2H), 1.66 (m, 6H), 1.52 (m, 2H), 1.39 (m, 4H).

LRMS (ES<sup>+</sup>): *m/z* (%) 301.2 [M+H]<sup>+</sup> (100)

HRMS (*m/z*): [MH<sup>+</sup>] calcd for C<sub>17</sub>H<sub>25</sub>N<sub>4</sub>O, 301.2023; found 301.2008

**1-cyclohexyl-6-morpholino-1H-imidazo[4,5-b]pyridin-2(3H)-one (57)**

Following the method outlined in General method 7, but using morpholine (87 μL, 1 mmol), the title compound (**57**) (56 mg, 37%) was obtained as a white solid.

<sup>1</sup>H NMR (500 MHz, DMSO-*d*<sub>6</sub>): δ 11.18 (brs, 1H), 7.55 (d, *J* = 2.3 Hz, 1H), 7.28 (d, *J* = 2.3 Hz); 4.14 (m, 1H), 3.76 (m, 4H), 3.08 (m, 4H), 2.09 (m, 2H), 1.84 (m, 2H), 1.70 (m, 3H), 1.41 (m, 3H).

LRMS (ES<sup>+</sup>): *m/z* (%) 303.2 [M+H]<sup>+</sup> (100)

HRMS (*m/z*): [MH<sup>+</sup>] calcd for C<sub>16</sub>H<sub>23</sub>N<sub>4</sub>O<sub>2</sub>, 303.1816; found 303.1803

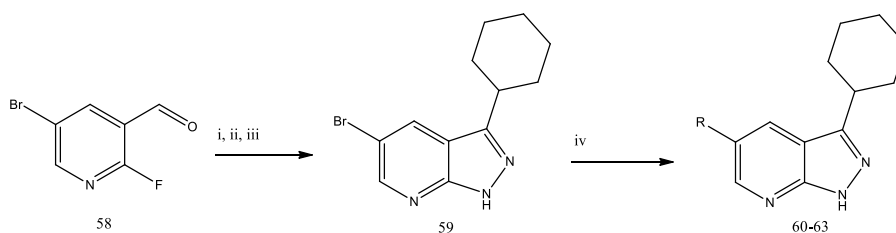

**Scheme 7:** i) Cyclohexylmagnesium bromide, THF,  $-78^{\circ}\text{C}$  to rt, 55%; ii) PDC, DCM,  $0^{\circ}\text{C}$  to rt, 96%; iii)  $\text{NH}_2\text{NH}_2 \cdot \text{H}_2\text{O}$ , EtOH, reflux, 95%; iv)  $\text{RB}(\text{OH})_2$ , 2M  $\text{Na}_2\text{CO}_3$ ,  $\text{Pd}(\text{PPh}_3)_4$ , DME: $\text{H}_2\text{O}$ :EtOH (7:3:2),  $140^{\circ}\text{C}$ , microwave, 16-69%.

### 5-bromo-3-cyclohexyl-1H-pyrazolo[3,4-b]pyridine (59)

To a stirred solution of 5-bromo-2-fluoro-3-formylpyridine (3.06g, 15 mmol) in THF (65 mL) at  $-78^{\circ}\text{C}$ , under an inert atmosphere was added 1M cyclohexylmagnesium bromide in THF (22.5 mL, 22.5 mmol) dropwise, the reaction warmed to room temperature and stirred for 16 hours. The reaction was quenched (saturated ammonium chloride solution), the layers separated and the aqueous layer extracted (EtOAc). The combined organics were washed (brine), dried ( $\text{MgSO}_4$ ) and concentrated *in vacuo*. The crude residue was purified by column chromatography, eluting with 0-20% EtOAc/hexane to give (5-bromo-2-fluoropyridin-3-yl)(cyclohexyl)methanol (168-016-001) (1.68g, 55%) as a yellow oil.

$^1\text{H}$  NMR (500 MHz,  $\text{DMSO}-d_6$ ):  $\delta$  8.24 (brd,  $J = 0.9$  Hz, 1H), 8.09 (dd,  $J = 2.2$  and 5.8 Hz); 5.51 (d,  $J = 4.90$  Hz, 1H), 4.48 (m, 1H), 1.70 (m, 3H), 1.56 (m, 2H), 1.38 (m, 1H), 1.09 (m, 5H).

LRMS (ES<sup>+</sup>):  $m/z$  (%) 288.0 [ $^{79}\text{Br}$  M+H]<sup>+</sup>, (100), 290.0 [ $^{81}\text{Br}$  M+H]<sup>+</sup> (98)

To a stirred suspension of Pyridinium dichromate (5.49g, 14.6 mmol) in DCM (15 mL) at  $0^{\circ}\text{C}$ , under an inert atmosphere, was added (5-bromo-2-fluoropyridin-3-yl)(cyclohexyl)methanol (1.68g, 5.83 mmol) in DCM (5 mL), the reaction warmed to room temperature and stirred for 66 hours. Additional Pyridinium dichromate (5.49g, 14.6 mmol) was added and stirring continued for 24 hours. The reaction mixture was filtered through a pad of HM-N sorbent and the filtrate was concentrated *in vacuo* to give a crude residue which was purified by column chromatography, eluting with 0-10% EtOAc/hexane, to give (5-bromo-2-fluoropyridin-3-yl)(cyclohexyl)methanone (1.52g, 96%) as a straw oil.

$^1\text{H}$  NMR (500 MHz,  $\text{DMSO-}d_6$ ):  $\delta$  8.60 (m, 1H), 8.51 (dd,  $J = 2.5$  and  $5.8$  Hz, 1H), 3.17 (m, 1H), 1.84 (m, 2H), 1.74 (m, 2H), 1.65 (m, 1H), 1.40-1.09 (m, 5H).

LRMS (ES+):  $m/z$  (%) 286.0 [ $^{79}\text{Br}$  M+H] $^+$ (100), 288.0 [ $^{81}\text{Br}$  M+H] $^+$  (98)

To a stirred solution of (5-bromo-2-fluoropyridin-3-yl)(cyclohexyl)methanone (1.51g, 5.28 mmol) in EtOH (20 mL) was added hydrazine hydrate (770 $\mu\text{L}$ , 15.8 mmol), the reaction heated to reflux and stirred for 16 hours. The solvent was removed *in vacuo* to give the title compound (**59**) (1.41g, 95%) as a white solid.

$^1\text{H}$  NMR (500 MHz,  $\text{DMSO-}d_6$ ):  $\delta$  13.36 (brs, 1H), 8.60 (m, 1H), 8.54 (m, 1H), 3.04 (m, 1H), 1.96 (m, 2H), 1.82 (m, 2H), 1.67 (m, 3H), 1.38 (m, 3H).

LRMS (ES+):  $m/z$  (%) 280.0 [ $^{79}\text{Br}$  M+H] $^+$ (100), 282.0 [ $^{81}\text{Br}$  M+H] $^+$  (98)

### 3-cyclohexyl-5-phenyl-1H-pyrazolo[3,4-b]pyridine (**60**) (General method 8)

A capped process vial containing 5-bromo-3-cyclohexyl-1H-pyrazolo[3,4-b]pyridine (140 mg, 0.5 mmol), benzenboronic acid pinacol ester (142 mg, 0.6mol), sodium carbonate (0.38 mL of a 2M solution in water, 0.76 mmol) and tetrakis(triphenylphosphine)palladium (0) (12 mg, 2mol%) in 7:3:2 1,2-dimethoxyethane:water:ethanol (3 mL) was degassed, flooded with argon and heated under microwave irradiation at 140 $^\circ\text{C}$  for 35 minutes. The reaction was diluted with DCM, washed (saturated sodium bicarbonate) and concentrated *in vacuo*. The resultant crude residue was purified by column chromatography on KP-NH silica, eluting with 0-100% EtOAc/DCM, followed by reverse-phase HPLC, to give the title compound (**60**) (88 mg, 63%) as a white solid.

$^1\text{H}$  NMR (500 MHz,  $\text{DMSO-}d_6$ ):  $\delta$  13.23 (brs, 1H), 8.78 (d,  $J = 1.9$  Hz, 1H), 8.50 (d,  $J = 2.0$  Hz, 1H), 7.80 (m, 2H), 7.51 (m, 2H), 7.41 (m, 1H), 3.11 (m, 1H), 2.04 (m, 2H), 1.84 (m, 2H), 1.72 (m, 3H), 1.40 (m, 3H).

LRMS (ES+):  $m/z$  (%) 278.2 [M+H] $^+$  (100)

HRMS ( $m/z$ ): [MH+] $^+$  calcd for  $\text{C}_{18}\text{H}_{20}\text{N}_3$ , 278.1652; found 278.1640

### **(2-(3-cyclohexyl-1H-pyrazolo[3,4-b]pyridin-5-yl)phenyl)methanol (61)**

Following the method outlined in General method 8, but using (2-hydroxymethyl)benzeneboronic acid (91 mg, 0.6 mmol), the title compound (**61**) (25 mg, 16%) was obtained as a white solid.

$^1\text{H}$  NMR (500 MHz,  $\text{DMSO-}d_6$ ):  $\delta$  13.27 (brs, 1H), 8.48 (d,  $J = 2.1$  Hz, 1H), 8.32 (d,  $J = 2.0$  Hz, 1H), 7.60 (d,  $J = 7.7$  Hz, 1H), 7.38 (m, 3H), 5.21 (t,  $J = 5.3$  Hz, 1H), 4.41 (d,  $J = 5.2$  Hz, 2H), 3.05 (m, 1H), 2.00 (m, 2H), 1.81 (m, 2H), 1.68 (m, 3H), 1.38 (m, 3H).

LRMS (ES+):  $m/z$  (%) 308.2  $[\text{M}+\text{H}]^+$  (100)

HRMS ( $m/z$ ):  $[\text{MH}^+]$  calcd for  $\text{C}_{19}\text{H}_{22}\text{N}_3\text{O}$ , 308.1757; found 308.1741

### **3-cyclohexyl-5-(2-(methoxymethyl)phenyl)-1H-pyrazolo[3,4-b]pyridine (62)**

Following the method outlined in General method 8, but using (2-methoxymethyl)benzeneboronic acid (100 mg, 0.6 mmol), the title compound (**62**) (111 mg, 69%) was obtained as a white solid.

$^1\text{H}$  NMR (500 MHz,  $\text{DMSO-}d_6$ ):  $\delta$  13.26 (brs, 1H), 8.48 (d,  $J = 1.9$  Hz, 1H), 8.31 (d,  $J = 1.9$  Hz, 1H), 7.55 (m, 1H), 7.44 (m, 2H), 7.40 (m, 1H), 4.29 (s, 2H), 3.30 (s, 3H), 3.05 (m, 1H), 2.01 (m, 2H), 1.82 (m, 2H), 1.69 (m, 3H), 1.38 (m, 3H).

LRMS (ES+):  $m/z$  (%) 322.2  $[\text{M}+\text{H}]^+$  (100)

HRMS ( $m/z$ ):  $[\text{MH}^+]$  calcd for  $\text{C}_{20}\text{H}_{24}\text{N}_3\text{O}$ , 322.1914; found 322.1901

### **3-cyclohexyl-5-(pyridin-3-yl)-1H-pyrazolo[3,4-b]pyridine (63)**

Following the method outlined in General method 8, but using 3-pyridineboronic acid (74 mg, 0.6 mmol), the title compound (**63**) (74 mg, 53%) was obtained as a white solid.

$^1\text{H}$  NMR (500 MHz,  $\text{DMSO-}d_6$ ):  $\delta$  13.08 (brs, 1H), 8.81 (m, 1H), 8.61 (d,  $J = 2.0$  Hz, 1H), 8.41 (d,  $J = 2.0$  Hz, 1H), 8.38 (dd,  $J = 1.5$  and  $3.2$  Hz, 1H), 8.00 (m, 1H), 7.33 (m, 1H), 2.90 (m, 1H), 1.82 (m, 2H), 1.64 (m, 2H), 1.49 (m, 3H), 1.20 (m, 3H).

LRMS (ES+):  $m/z$  (%) 279.2  $[\text{M}+\text{H}]^+$  (100)

HRMS ( $m/z$ ):  $[\text{MH}^+]$  calcd for  $\text{C}_{17}\text{H}_{19}\text{N}_4$ , 279.1604; found 279.1591

## S2. Kinase Profiling data

|                                                                                   |                                                      |
|-----------------------------------------------------------------------------------|------------------------------------------------------|
|  | % of activity higher than 30% respect of the control |
|  | higher 90% inhibition                                |
|  | between 80% and 90% of inhibition                    |
|  | between 80% and 70% of inhibition                    |

| ID                  | 1                                                                                 | 12                                                                                | 10                                                                                 | 14                                                                                  |
|---------------------|-----------------------------------------------------------------------------------|-----------------------------------------------------------------------------------|------------------------------------------------------------------------------------|-------------------------------------------------------------------------------------|
| <b>Structure</b>    | 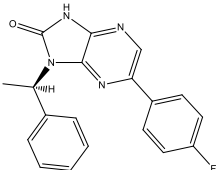 |  |  |  |
| <b>Structure</b>    | <b>C<sub>19</sub>H<sub>15</sub>FN<sub>4</sub>O</b>                                | <b>C<sub>17</sub>H<sub>17</sub>FN<sub>4</sub>O</b>                                | <b>C<sub>15</sub>H<sub>13</sub>FN<sub>4</sub>O</b>                                 | <b>C<sub>19</sub>H<sub>16</sub>N<sub>4</sub>O</b>                                   |
| MKK1                | 106                                                                               | 62                                                                                | 97                                                                                 | 87                                                                                  |
| ERK1                | 153                                                                               | 115                                                                               | 112                                                                                | 105                                                                                 |
| ERK2                | 65                                                                                | 41                                                                                | 84                                                                                 | 121                                                                                 |
| JNK1                | 95                                                                                | 95                                                                                | 100                                                                                | 97                                                                                  |
| JNK2                | 104                                                                               | 93                                                                                | 97                                                                                 | 96                                                                                  |
| p38a MAPK           | 88                                                                                | 86                                                                                | 87                                                                                 | 88                                                                                  |
| P38b MAPK           | 84                                                                                | 122                                                                               | 101                                                                                | 95                                                                                  |
| p38g MAPK           | 98                                                                                | 98                                                                                | 94                                                                                 | 91                                                                                  |
| p38s MAPK           | 108                                                                               | 76                                                                                | 91                                                                                 | 77                                                                                  |
| ERK8                | 73                                                                                | 80                                                                                | 70                                                                                 | 79                                                                                  |
| RSK1                | 96                                                                                | 89                                                                                | 85                                                                                 | 89                                                                                  |
| RSK2                | 110                                                                               | 104                                                                               | 113                                                                                | 101                                                                                 |
| PDK1                | 99                                                                                | 98                                                                                | 96                                                                                 | 91                                                                                  |
| PKBa                | 99                                                                                | 102                                                                               | 96                                                                                 | 89                                                                                  |
| PKBb                | 117                                                                               | 106                                                                               | 120                                                                                | 100                                                                                 |
| SGK1                | 104                                                                               | 111                                                                               | 110                                                                                | 98                                                                                  |
| S6K1                | 81                                                                                | 97                                                                                | 92                                                                                 | 65                                                                                  |
| PKA                 | 87                                                                                | 95                                                                                | 93                                                                                 | 72                                                                                  |
| ROCK 2              | 105                                                                               | 84                                                                                | 78                                                                                 | 85                                                                                  |
| PRK2                | 111                                                                               | 112                                                                               | 99                                                                                 | 97                                                                                  |
| PKCa                | 101                                                                               | 94                                                                                | 106                                                                                | 98                                                                                  |
| PKC zeta            | 94                                                                                | 90                                                                                | 90                                                                                 | 88                                                                                  |
| PKD1                | 55                                                                                | 60                                                                                | 40                                                                                 | 44                                                                                  |
| MSK1                | 89                                                                                | 97                                                                                | 89                                                                                 | 93                                                                                  |
| MNK1                | 83                                                                                | 93                                                                                | 93                                                                                 | 76                                                                                  |
| MNK2                | 106                                                                               | 103                                                                               | 99                                                                                 | 97                                                                                  |
| MAPKAP-K2           | 90                                                                                | 101                                                                               | 104                                                                                | 84                                                                                  |
| PRAK                | 103                                                                               | 99                                                                                | 99                                                                                 | 98                                                                                  |
| CAMKKb              | 101                                                                               | 104                                                                               | 98                                                                                 | 86                                                                                  |
| CAMK1               | 87                                                                                | 88                                                                                | 83                                                                                 | 72                                                                                  |
| SmMLCK              | 80                                                                                | 89                                                                                | 74                                                                                 | 64                                                                                  |
| PHK                 | 103                                                                               | 110                                                                               | 97                                                                                 | 94                                                                                  |
| CHK1                | 100                                                                               | 96                                                                                | 90                                                                                 | 94                                                                                  |
| CHK2                | 97                                                                                | 96                                                                                | 97                                                                                 | 93                                                                                  |
| GSK3b               | 63                                                                                | 70                                                                                | 37                                                                                 | 66                                                                                  |
| CDK2-Cyclin A       | 89                                                                                | 84                                                                                | 82                                                                                 | 84                                                                                  |
| PLK1                | 111                                                                               | 117                                                                               | 102                                                                                | 104                                                                                 |
| PLK1 (Okadaic Acid) | 96                                                                                | 96                                                                                | 109                                                                                | 104                                                                                 |
| Aurora B            | 117                                                                               | 85                                                                                | 93                                                                                 | 99                                                                                  |
| AMPK                | 97                                                                                | 100                                                                               | 94                                                                                 | 95                                                                                  |
| MARK3               | 110                                                                               | 98                                                                                | 97                                                                                 | 100                                                                                 |
| BRSK2               | 82                                                                                | 100                                                                               | 90                                                                                 | 72                                                                                  |
| MELK                | 118                                                                               | 110                                                                               | 125                                                                                | 100                                                                                 |
| CK1                 | 75                                                                                | 98                                                                                | 75                                                                                 | 71                                                                                  |
| CK2                 | 107                                                                               | 111                                                                               | 105                                                                                | 105                                                                                 |
| DYRK1A              | 79                                                                                | 93                                                                                | 113                                                                                | 85                                                                                  |
| DYRK2               | 100                                                                               | 99                                                                                | 94                                                                                 | 89                                                                                  |
| DYRK3               | 109                                                                               | 99                                                                                | 108                                                                                | 100                                                                                 |
| NEK2a               | 117                                                                               | 93                                                                                | 101                                                                                | 96                                                                                  |
| NEK6                | 89                                                                                | 94                                                                                | 86                                                                                 | 80                                                                                  |
| IKKb                | 103                                                                               | 94                                                                                | 105                                                                                | 77                                                                                  |
| PIM1                | 80                                                                                | 82                                                                                | 79                                                                                 | 72                                                                                  |
| PIM2                | 113                                                                               | 111                                                                               | 111                                                                                | 96                                                                                  |
| PIM3                | 83                                                                                | 90                                                                                | 89                                                                                 | 83                                                                                  |
| SRPK1               | 80                                                                                | 88                                                                                | 89                                                                                 | 75                                                                                  |
| MST2                | 86                                                                                | 94                                                                                | 92                                                                                 | 78                                                                                  |
| EF2K                | 93                                                                                | 98                                                                                | 92                                                                                 | 79                                                                                  |
| HIPK2               | 101                                                                               | 97                                                                                | 69                                                                                 | 80                                                                                  |
| PAK4                | 101                                                                               | 103                                                                               | 106                                                                                | 86                                                                                  |
| PAK5                | 84                                                                                | 100                                                                               | 95                                                                                 | 80                                                                                  |
| PAK6                | 89                                                                                | 106                                                                               | 98                                                                                 | 88                                                                                  |
| Src                 | 80                                                                                | 94                                                                                | 98                                                                                 | 70                                                                                  |
| Lck                 | 90                                                                                | 105                                                                               | 99                                                                                 | 89                                                                                  |
| CSK                 | 100                                                                               | 90                                                                                | 93                                                                                 | 77                                                                                  |
| FGF-R1              | 95                                                                                | 96                                                                                | 88                                                                                 | 63                                                                                  |
| IRR                 | 96                                                                                | 83                                                                                | 104                                                                                | 112                                                                                 |
| EPH A2              | 105                                                                               | 97                                                                                | 96                                                                                 | 89                                                                                  |
| MST4                | 90                                                                                | 100                                                                               | 92                                                                                 | 88                                                                                  |
| SYK                 | 97                                                                                | 100                                                                               | 98                                                                                 | 84                                                                                  |
| YES1                | 94                                                                                | 96                                                                                | 96                                                                                 | 71                                                                                  |
| IKKe                | 106                                                                               | 88                                                                                | 94                                                                                 | 91                                                                                  |
| TBK1                | 95                                                                                | 92                                                                                | 95                                                                                 | 100                                                                                 |
| IGF-1R              | 122                                                                               | 100                                                                               | 85                                                                                 | 112                                                                                 |
| VEG-FR              | 117                                                                               | 107                                                                               | 98                                                                                 | 73                                                                                  |
| BTK                 | 113                                                                               | 111                                                                               | 104                                                                                | 97                                                                                  |
| IR-HIS              | 88                                                                                | 119                                                                               | 109                                                                                | 93                                                                                  |
| EPH-B3              | 113                                                                               | 110                                                                               | 92                                                                                 | 102                                                                                 |
| TBK1 (DUJ2569)      | 95                                                                                | 90                                                                                | 86                                                                                 | 78                                                                                  |
| IKK epsilon (14231) | 124                                                                               | 98                                                                                | 103                                                                                | 87                                                                                  |

### S3. STPH screen assay protocols

*Activity against Trypanosoma brucei rhodesiense STIB900.* This stock was isolated in 1982 from a human patient in Tanzania and after several mouse passages cloned and adapted to axenic culture conditions (Baltz et al 1985). Minimum Essential Medium (50  $\mu$ l) supplemented with 25 mM HEPES, 1g/l additional glucose, 1% MEM non-essential amino acids (100x), 0.2 mM 2-mercaptoethanol, 1mM Na-pyruvate and 15% heat inactivated horse serum was added to each well of a 96-well microtiter plate. Compounds were dissolved in 30% DMSO at 3 mM and further diluted with MEM to 100  $\mu$ M. 5  $\mu$ l and 1  $\mu$ l of the compound solution respectively were added to the wells, resulting in a test concentration of 5 $\mu$ M and 1 $\mu$ M. One assay plate was prepared per test concentration. Then  $4 \times 10^3$  bloodstream forms of *T. b. rhodesiense* STIB 900 in 50  $\mu$ l was added to each well and the plate incubated at 37 °C under a 5 % CO<sub>2</sub> atmosphere for 70 h. 10  $\mu$ l resazurin solution (resazurin, 12.5 mg in 100 ml double-distilled water) was then added to each well and incubation continued for a further 2–4 h (Raz et al 1997). Then the plates were read with a Spectramax Gemini XS microplate fluorometer (Molecular Devices Cooperation, Sunnyvale, CA, USA) using an excitation wave length of 536 nm and an emission wave length of 588 nm. The data were evaluated in Excel. For each test concentration, the percent growth inhibition was calculated in comparison with an untreated control.

Baltz, T., D. Baltz, C. Giroud, and J. Crockett. 1985. Cultivation in a semi-defined medium of animal infective forms of *Trypanosoma brucei*, *T. equiperdum*, *T. evansi*, *T. rhodesiense* and *T. gambiense*. EMBO Journal 4:1273-1277.

Ráz, B., M. Iten, Y. Grether-Buhler, R. Kaminsky, and R. Brun. 1997. The Alamar Blue assay to determine drug sensitivity of African trypanosomes (*T.b. rhodesiense* and *T.b. gambiense*) in vitro. Acta Trop 68:139-47.

*In vitro cytotoxicity with L-6 cells.* Assays were performed in 96-well microtiter plates, each well containing 100  $\mu$ l of RPMI 1640 medium supplemented with 1% L-glutamine (200mM) and 10% fetal bovine serum, and 4000 L-6 cells (a primary cell line derived from rat skeletal myoblasts)( Page et al., 1993 and Ahmed et al., 1994). Compounds were dissolved in 30% DMSO at 3 mM and further diluted with MEM to 100  $\mu$ M. 5  $\mu$ l and 1  $\mu$ l of the compound solution respectively were added to the wells, resulting in a test concentration of 5 $\mu$ M and 1 $\mu$ M. One assay plate was prepared per test concentration. After 70hours of incubation at 37



°C under a 5 % CO<sub>2</sub> atmosphere the plates were inspected under an inverted microscope to assure growth of the controls and sterile conditions. 10 µl resazurin solution (resazurin, 12.5 mg in 100 ml double-distilled water) was then added to each well and incubation continued for a further 2h. Then the plates were read with a Spectramax Gemini XS microplate fluorometer (Molecular Devices Cooperation, Sunnyvale, CA, USA) using an excitation wave length of 536 nm and an emission wave length of 588 nm. The data were evaluated in Excel. For each test concentration, the percent growth inhibition was calculated in comparison with an untreated control.

C.Page C, M. Page and C. Noel. 1993. A new fluorimetric assay for cytotoxicity measurements in vitro. *International Journal of Oncology* 3: 473–476.

S.A. Ahmed, R.M. Gogal and J.E. Walsh. 1994. A new rapid and simple non-radioactive assay to monitor and determine the proliferation of lymphocytes: an alternative to [3H] thymidine incorporation assay. *The Journal of Immunological Methods* 170: 211–224.

**Definition of test score:**

If growth inhibition at higher concentration is <50% the compound is classified as not toxic

**Hit rate details from MTS screen of kinase set**

Table 1 Numbers of hits and hit rate depending on activity criteria

| activity criteria | <i>T.b. rhod.</i> (5 <sup>µ</sup> M) |               | <i>T.b. rhod.</i> (1 <sup>µ</sup> M) |               | Cytotoxicity (30 <sup>µ</sup> M) |               |
|-------------------|--------------------------------------|---------------|--------------------------------------|---------------|----------------------------------|---------------|
|                   | # hits                               | hit rate in % | # hits                               | hit rate in % | # hits                           | hit rate in % |
| ≥ 50              | 121                                  | 3.1           | 29                                   | 0.7           | 131                              | 3.4           |
| ≥ 60              | 95                                   | 2.4           | 21                                   | 0.5           | 78                               | 2             |
| ≥ 70              | 78                                   | 2             | 19                                   | 0.5           | 47                               | 1.2           |
| ≥ 80              | 63                                   | 1.6           | 16                                   | 0.4           | 34                               | 0.9           |
| Tested cpds       | 3885                                 |               |                                      |               |                                  |               |

## S4. Dose response and kill curves from *T.b.brucei*. static/cidal assay

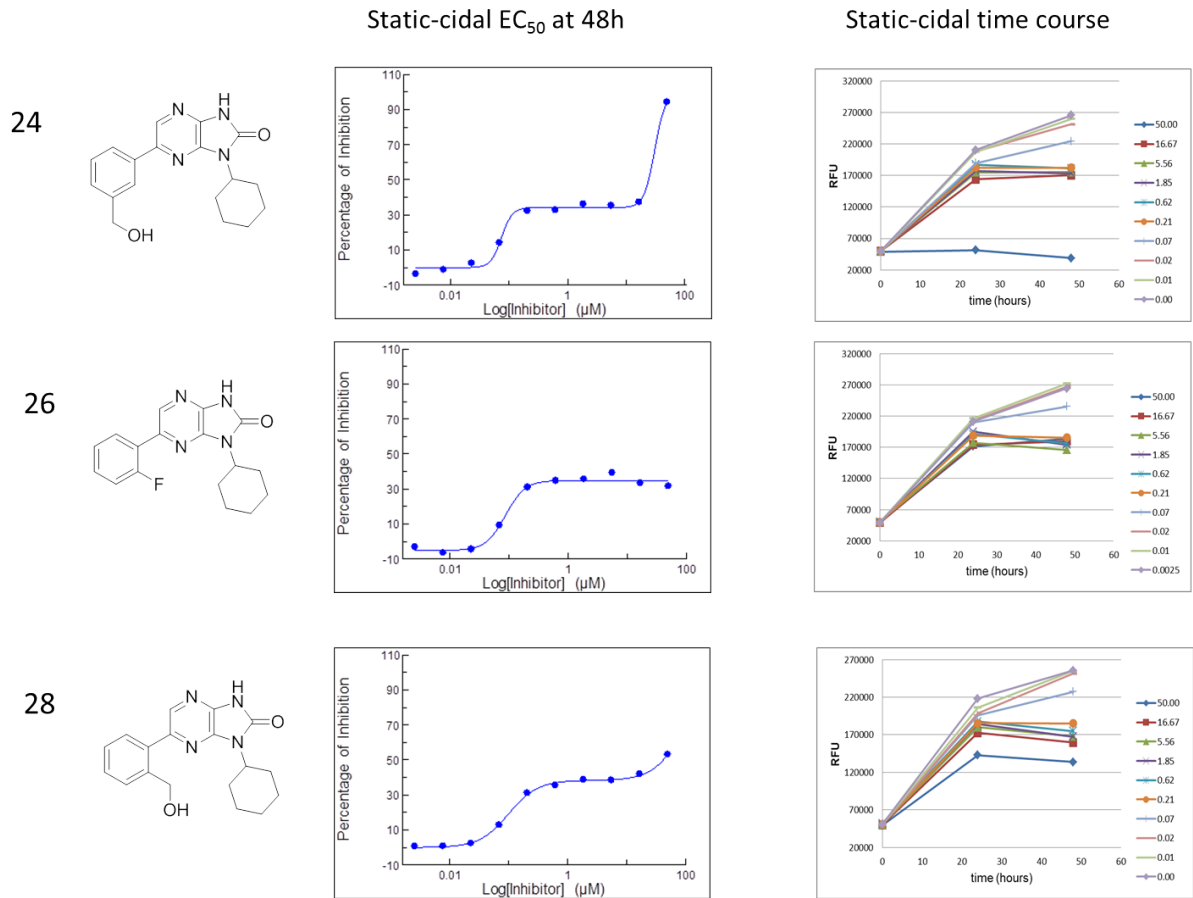

30

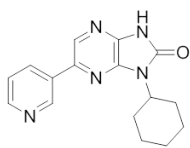

Static-cidal EC<sub>50</sub> at 48h

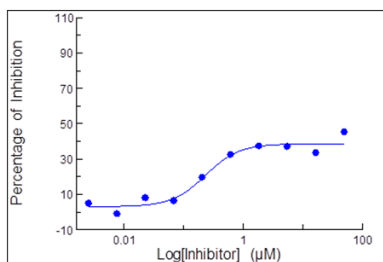

Static-cidal time course

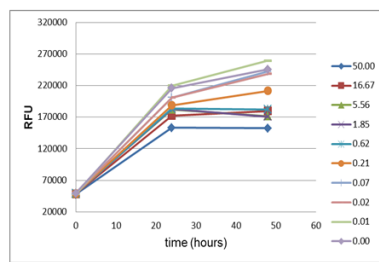

39

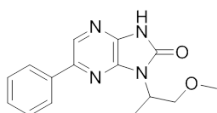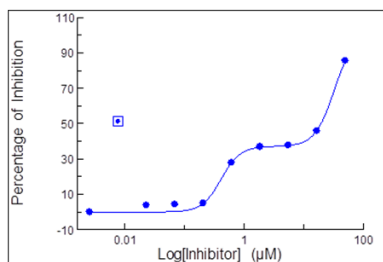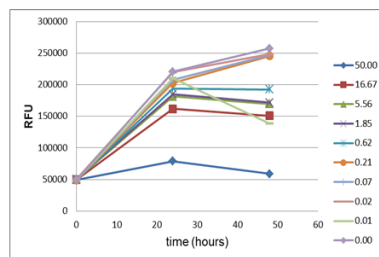

51

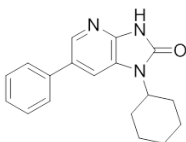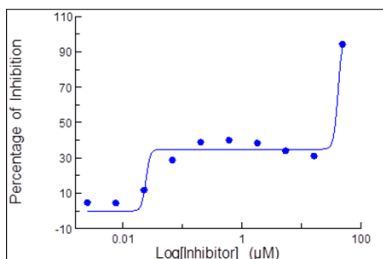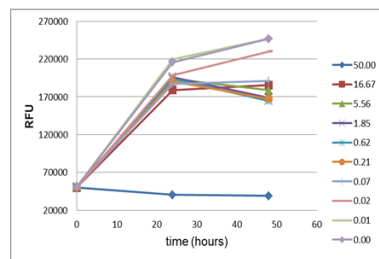

55

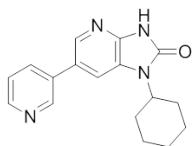

Static-cidal EC<sub>50</sub> at 48h

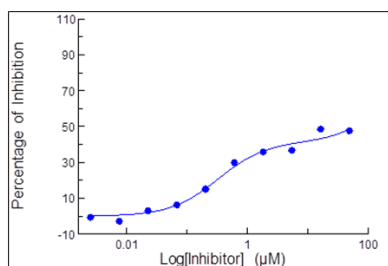

Static-cidal time course

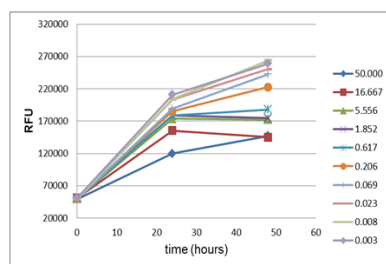

56

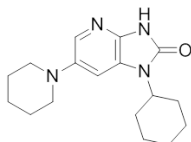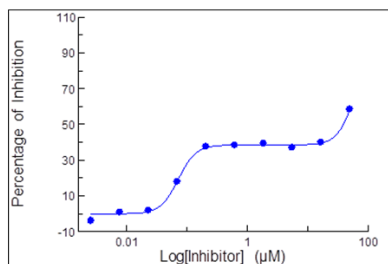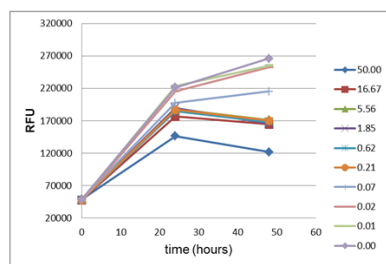

60

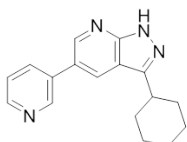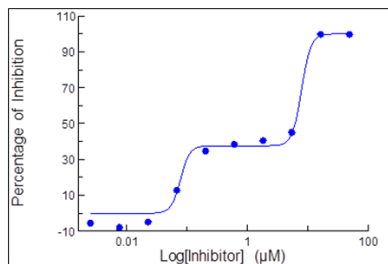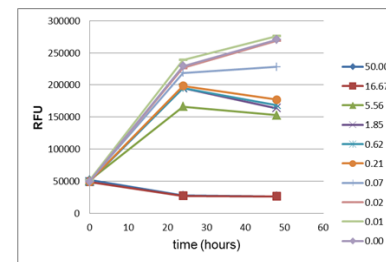

63

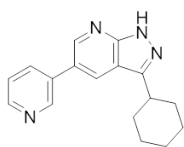

Static-cidal  $EC_{50}$  at 48h

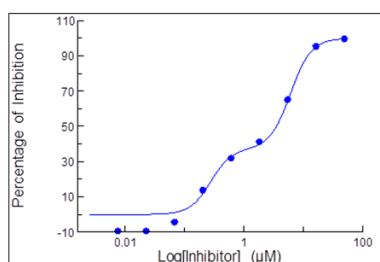

Static-cidal time course

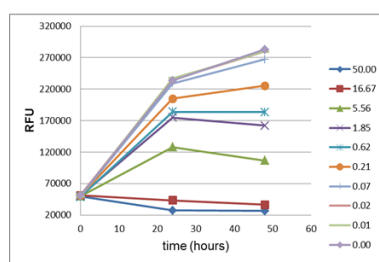

Pentamidine

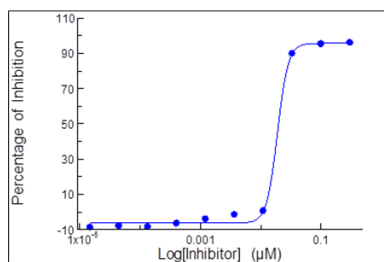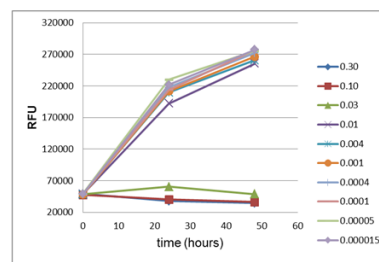

Melarsoprol

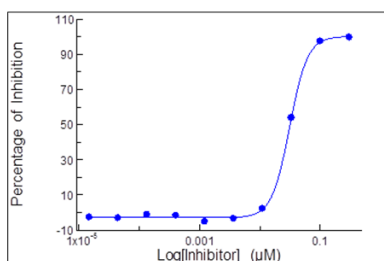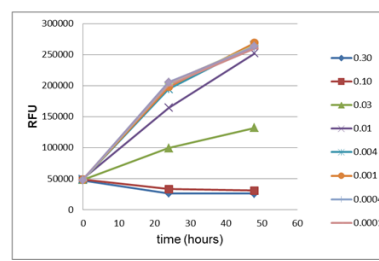

Supplement: cmdc0010-1809-sd1.pdf [file cmdc0010-1809-sd1.pdf]
